# Supplementary material for: Ferrocene-appended anthraquinone and coumarin as redox-active cytotoxins
Source: Royal Society of Chemistry journal article supplement (doi:10.1039/d2dt01251k), 2022-01-01
Supplement: d2dt01251k1.pdf [file d2dt01251k1.pdf]

## Supplementary Information

### Ferrocene-appended Anthraquinone and Coumarin as Redox-active Cytotoxins

Aryan Houshmand,<sup>a</sup> Devon Heroux,<sup>b</sup> Dennis Y. Liu,<sup>a</sup> Wen Zhou,<sup>a</sup> Roger G. Linington,<sup>a</sup> Marcel Bally,<sup>b</sup> Jeffrey J. Warren,<sup>a</sup> and Charles J. Walsby<sup>a,\*</sup>

a) Department of Chemistry, Simon Fraser University, 8888 University Dr., Burnaby, BC, V5A 1S6, Canada.

b) BC Cancer Research Institute, 675 West 10th Ave., Vancouver, BC, V5Z 1L3, Canada.

#### Table of Contents

#### Synthesis of Starting Materials.....S3

- 1,2-bis(prop-2-yn-1-yloxy)anthracene-9,10-dione (**1,2-DiPAQ**)
- 1-(prop-2-yn-1-yloxy)anthracene-9,10-dione (**1-PAQ**)
- 4-(prop-2-yn-1-yloxy)-2H-chromen-2-one (**4-PC**)
- (1-Azidoethyl)ferrocene (**Fc-EtAzide**)

#### <sup>1</sup>H/<sup>13</sup>C NMR and Mass Spectrometry Data.....S5

- **4-FcC**
- **1-FcAQ**
- **1,2-DiFcAQ**

#### EPR Spin Trapping.....S14

- **Figure S10-S13.** Time dependent spin trapping experiments using 50 mM DMPO, 10% MeCN and 100 μM of H<sub>2</sub>O<sub>2</sub> as a radical initiator in Milli-Q<sup>®</sup> H<sub>2</sub>O.
- **Figure S14.** Deconvolution of EPR spectrum from DMSO spin-trapping experiment with **4-FcC** at 90 min timepoint.

#### Antibacterial Screening Results.....S19

- **Table S1.** Antibacterial screening of **1,2-DiFcAQ**, **1-FcAQ**, **4-FcC** and enrofloxacin as a positive control. All values listed correlate to the MIC<sub>90</sub> in μM.
- **Table S2.** Antibacterial screening growth conditions and strain designations.

#### X-ray Crystallography.....S21

- Crystal data and details of data collection and refinement, fractional atomic coordinates, anisotropic displacement coordinates, bond lengths, bond angles, and hydrogen-atom coordinates: **1-FcAQ: Tables S2 – S7; 4-FcC: Tables S8 – S13.**
- **Figure S15.** Extended crystal lattice of **1-FcAQ**
- **Figure S16.** Extended crystal lattice of **4-FcC**

**Calculations of logP.....S37**

- LogP calculations of **1,2-DiFcAQ**, **1-FcAQ**, and **4-FcC**

**UV-Vis Characterization.....S38**

- **Figure S17.** UV-Vis spectrum of **1,2-DiFcAQ** and **1,2-DiOHAQ** in acetonitrile. Concentration = 25  $\mu\text{M}$ .
- **Figure S18.** UV-Vis spectrum of **1-FcAQ** and **1-OHAQ** in acetonitrile. Concentration = 25  $\mu\text{M}$ .
- **Figure S19.** UV-Vis spectrum of **4-FcC** and **4-OHC** in acetonitrile. Concentration = 100  $\mu\text{M}$ .

**References.....S40**

## Synthesis of Starting Materials

**1,2-bis(prop-2-yn-1-yloxy)anthracene-9,10-dione (1,2-DiPAQ).** Synthesis followed the literature.<sup>1</sup> In a 100 mL round bottom flask, alizarin (240 mg, 1 mmol), and  $K_2CO_3$  (830 mg, 6 mmol) were combined with 40 mL of dry acetone to obtain a deep purple solution. Propargyl bromide (0.15 mL, 2 mmol) was added, and the solution was refluxed for 60 h. The solution was concentrated, and the crude solid was added to DCM (50 mL) and the resulting suspension was washed with a 0.5 M solution of HCl ( $2 \times 10$  mL) and finally with brine ( $2 \times 20$  mL). The organic solution was dried over  $Na_2SO_4$  and concentrated to afford an orange gummy residue. The reaction mixture was not purified and reacted crude in the next step.

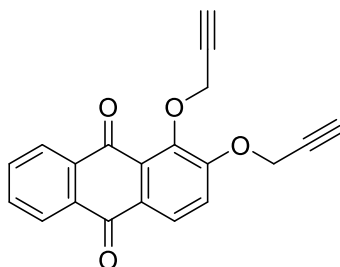

**1-(prop-2-yn-1-yloxy)anthracene-9,10-dione (1-PAQ).** Synthesis followed the literature.<sup>2</sup> In a 100 mL round bottom flask, 1-hydroxyanthracene-9,10-dione (224 mg, 1 mmol), and  $K_2CO_3$  (830 mg, 6 mmol) were combined with 40 mL of dry acetone to obtain a deep purple solution. Propargyl bromide (0.090 mL, 1.2 mmol) was added, and the solution was refluxed for 60 h. The solution was concentrated, and the crude solid was added with DCM (50 mL) and the resulting suspension was washed with a 0.5 M solution of HCl ( $2 \times 10$  mL) and finally with brine ( $2 \times 20$  mL). The organic solution was dried over  $Na_2SO_4$  and concentrated to afford an orange gummy residue. The reaction mixture was not purified and reacted crude in the next step.

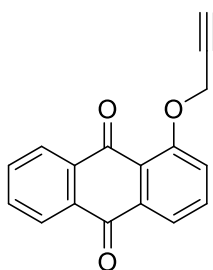

**4-(prop-2-yn-1-yloxy)-2H-chromen-2-one (4-PC).** Synthesis followed the literature.<sup>3</sup> 4-Hydroxycoumarin (162mg, 1mmol), K<sub>2</sub>CO<sub>3</sub> (414 mg, 3 mmol) in DMF were heated to 50 °C for half an hour. After cooling the solution, propargyl bromide (0.090 mL, 1.2 mmol) was added and stirred for 4 h at room temperature. The resulting solution is poured into ice water. The precipitate formed was filtered and washed with water to afford a white flaky precipitate. The crude reaction mixture was not purified and reacted crude in the next step.

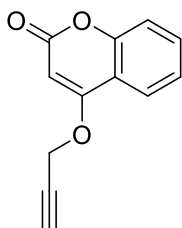

**(1-Azidoethyl)ferrocene (Fc-EtAzide).** Synthesis followed the literature.<sup>4</sup> 1-hydroxyethylferrocene (1.018 g, 4.4 mmol) and sodium azide (1.730 g, 26.6 mmol) were combined in a 100 mL round bottom flask with glacial acetic acid (50.6 mL, 885.5 mmol). The solution was allowed to react at 50 °C under N<sub>2</sub> for 4 hours. The reaction was then allowed to cool to room temperature and then diluted with DCM (200 mL). The solution was then washed with saturated NaHCO<sub>3</sub> (3 x 50 mL) followed by water (2 x 50 mL). The organic layer was then dried over Na<sub>2</sub>SO<sub>4</sub> to yield a crude orange solid. The crude product was not purified any further and reacted as is.

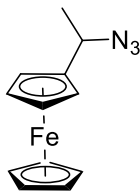

# $^1\text{H}/^{13}\text{C}$ NMR and Mass Spectrometry Data

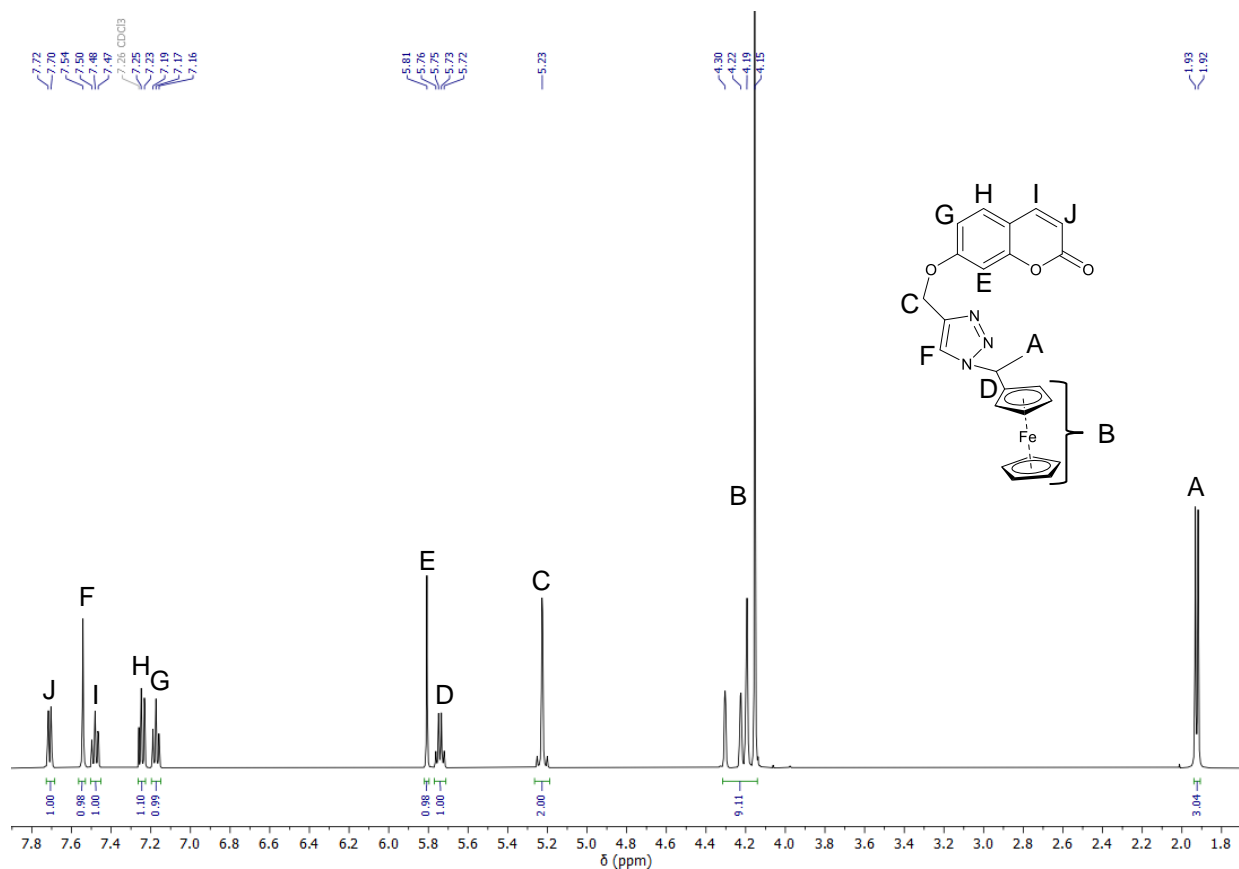

**Figure S1.**  $^1\text{H}$  NMR spectrum for 4-FcC (500 MHz,  $\text{CDCl}_3$ )  $\delta$  7.72 – 7.70 (dd,  $J = 7.9, 1.6$  Hz, 1H), 7.54 (s, 1H), 7.48 (ddd,  $J = 8.7, 7.3, 1.6$  Hz, 1H), 7.25 – 7.23 (m, 1H), 7.19 – 7.16 (m, 1H), 5.81 (s, 1H), 5.76 – 5.72 (q,  $J = 7.0$  Hz, 1H), 5.23 (d,  $J = 1.7$  Hz, 2H), 4.30 – 4.15 (m, 9H), 1.93 (d,  $J = 7.0$  Hz, 3H).

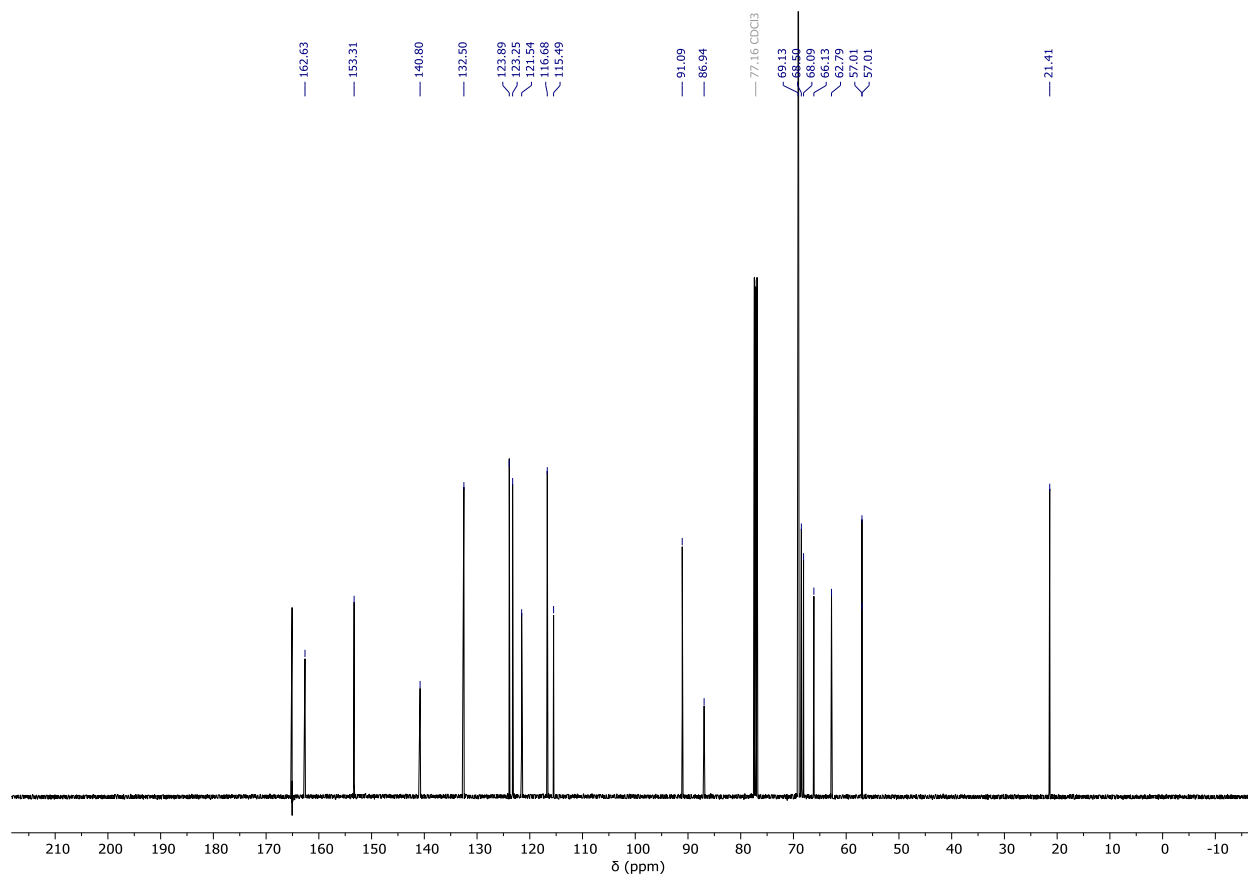

**Figure S2.**  $^{13}\text{C}$  NMR spectrum for **4-FcC** (500 MHz,  $\text{CDCl}_3$ )

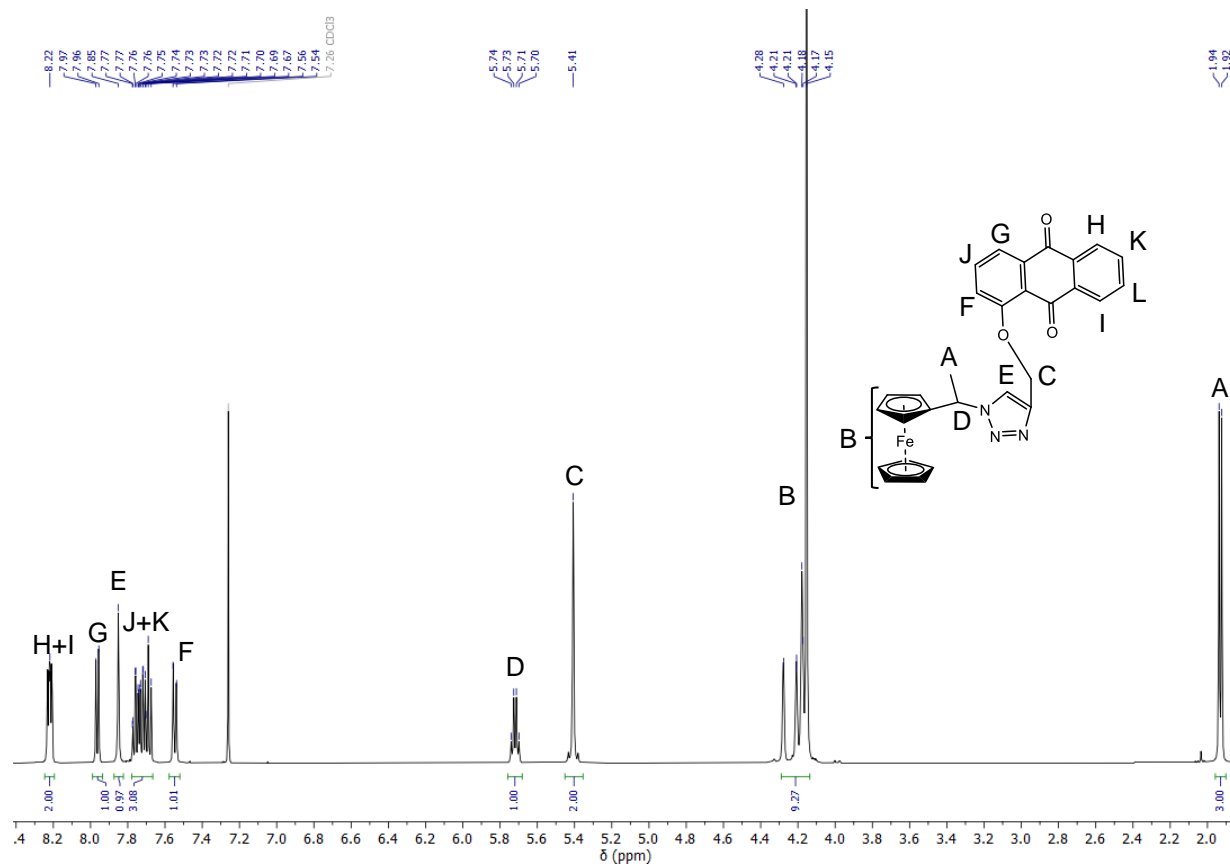

**Figure S3.**  $^1\text{H}$  NMR spectrum for **1-FcAQ** (500 MHz,  $\text{CDCl}_3$ )  $\delta$  8.22 (ddd,  $J = 7.3, 4.3, 1.5$  Hz, 2H), 7.96 (dd,  $J = 7.7, 1.0$  Hz, 1H), 7.85 (s, 1H), 7.77 – 7.67 (m, 3H), 7.56 (dd,  $J = 8.4, 1.1$  Hz, 1H), 5.72 (q,  $J = 7.0$  Hz, 1H), 5.41 (s, 2H), 4.28 – 4.15 (m, 9H), 1.93 (d,  $J = 7.0$  Hz, 3H).

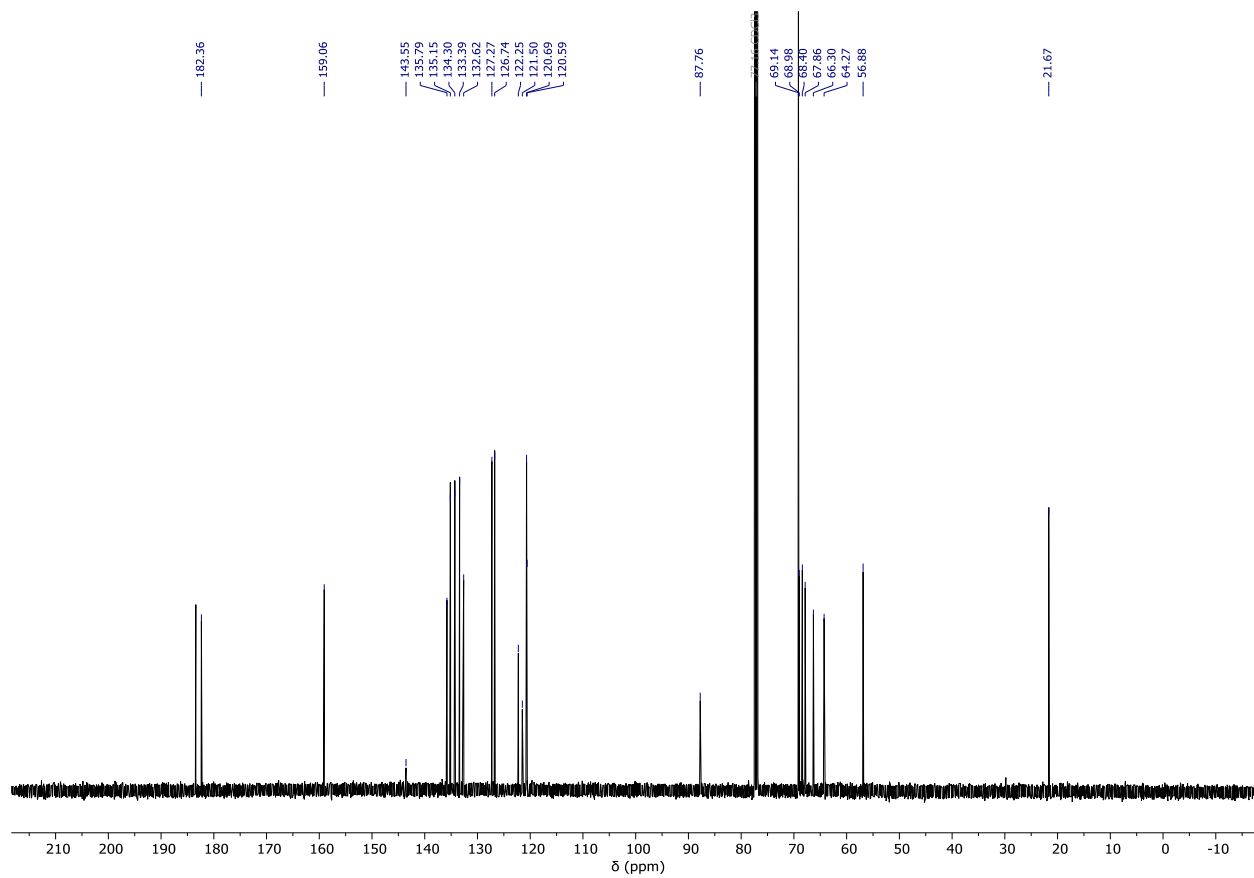

**Figure S4.**  $^{13}\text{C}$  NMR spectrum for **1-FcAQ** (500 MHz,  $\text{CDCl}_3$ ).



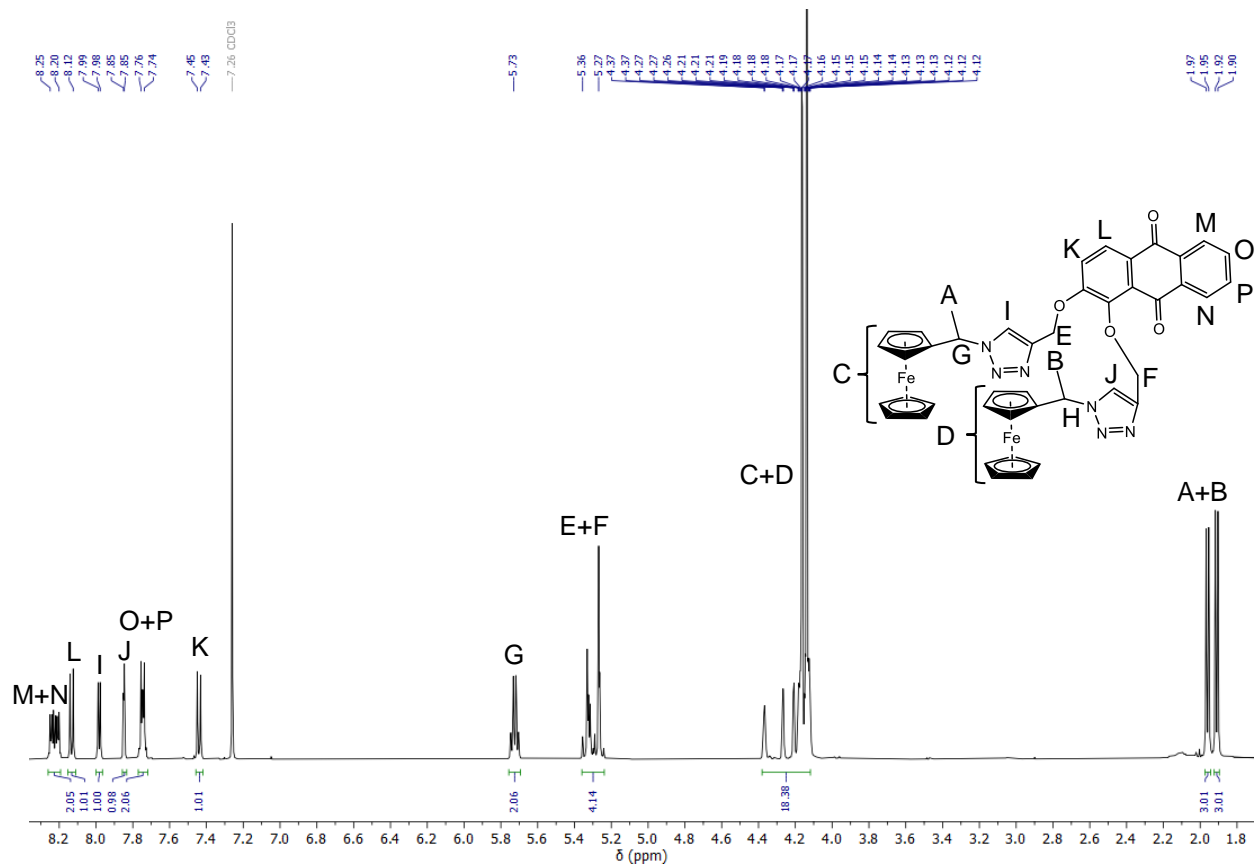

**Figure S5.** <sup>1</sup>H NMR spectrum for **1,2-DiFcAQ** (500 MHz, CDCl<sub>3</sub>) δ 8.25 – 8.20 (m, 2H), 8.12 (d, J = 8.7 Hz, 1H), 7.99 – 7.98 (d, J = 5.7 Hz, 1H), 7.85 (d, J = 2.2 Hz, 1H), 7.76 – 7.74 (m, 2H), 7.45 – 7.43 (d, J = 8.7 Hz, 1H), 5.73 (m, 2H), 5.36 – 5.27 (m, 4H), 4.37 – 4.12 (m, 18H), 1.96 (d, J = 7.1 Hz, 3H), 1.91 (d, J = 7.1 Hz, 3H).

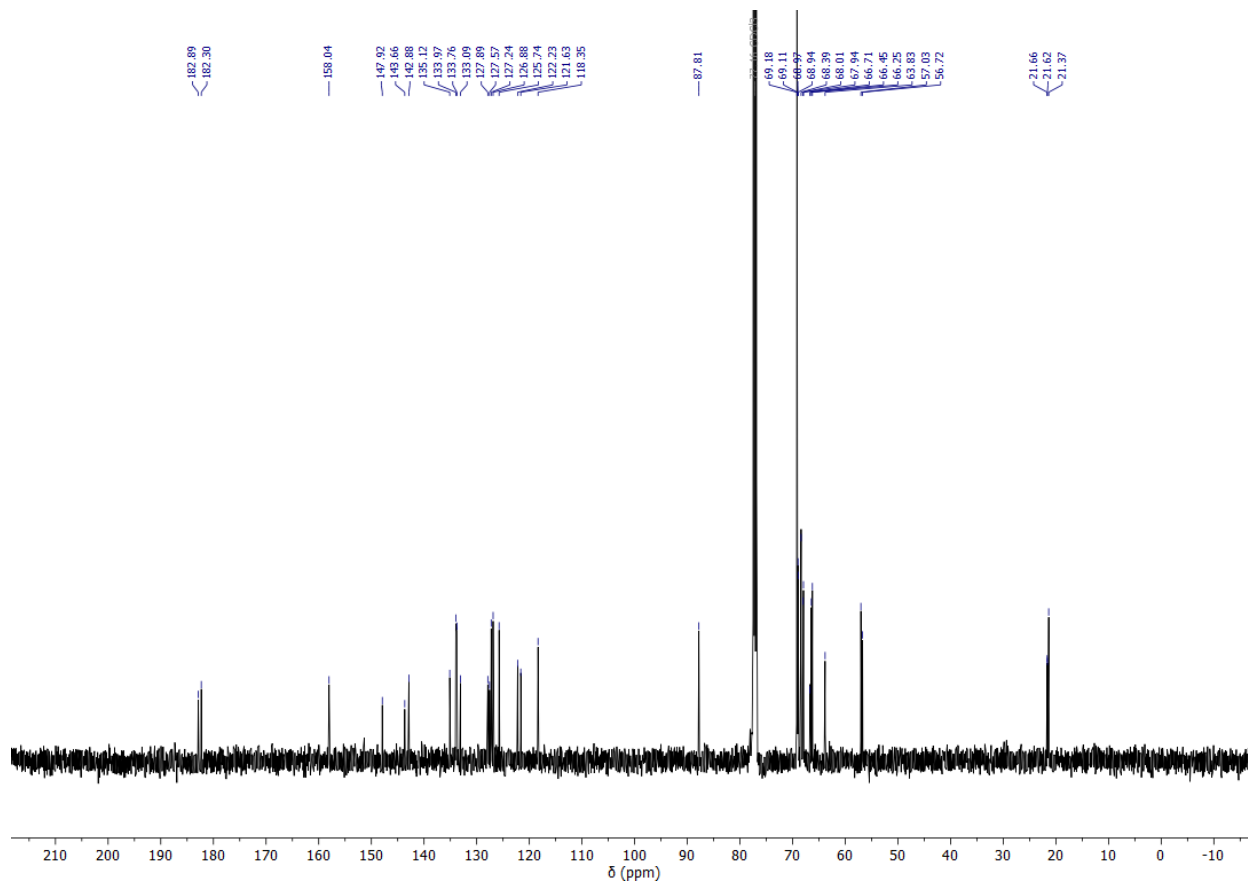

**Figure S6.**  $^{13}\text{C}$  NMR spectrum for **1,2-DiFcAQ** (500 MHz,  $\text{CDCl}_3$ ).

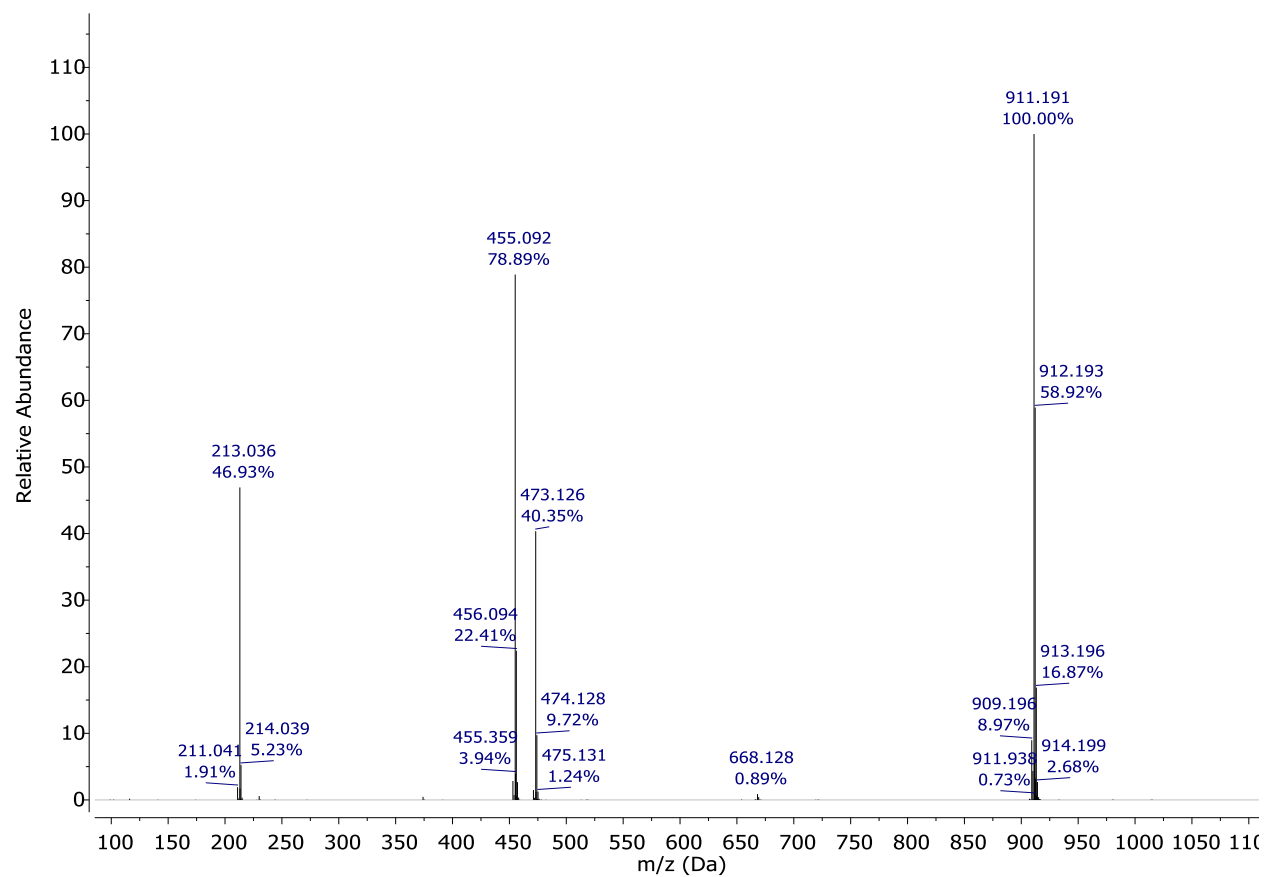

**Figure S7.** Mass Spectrum scan for **4-FcC** using an ESI-ToF in positive mode.

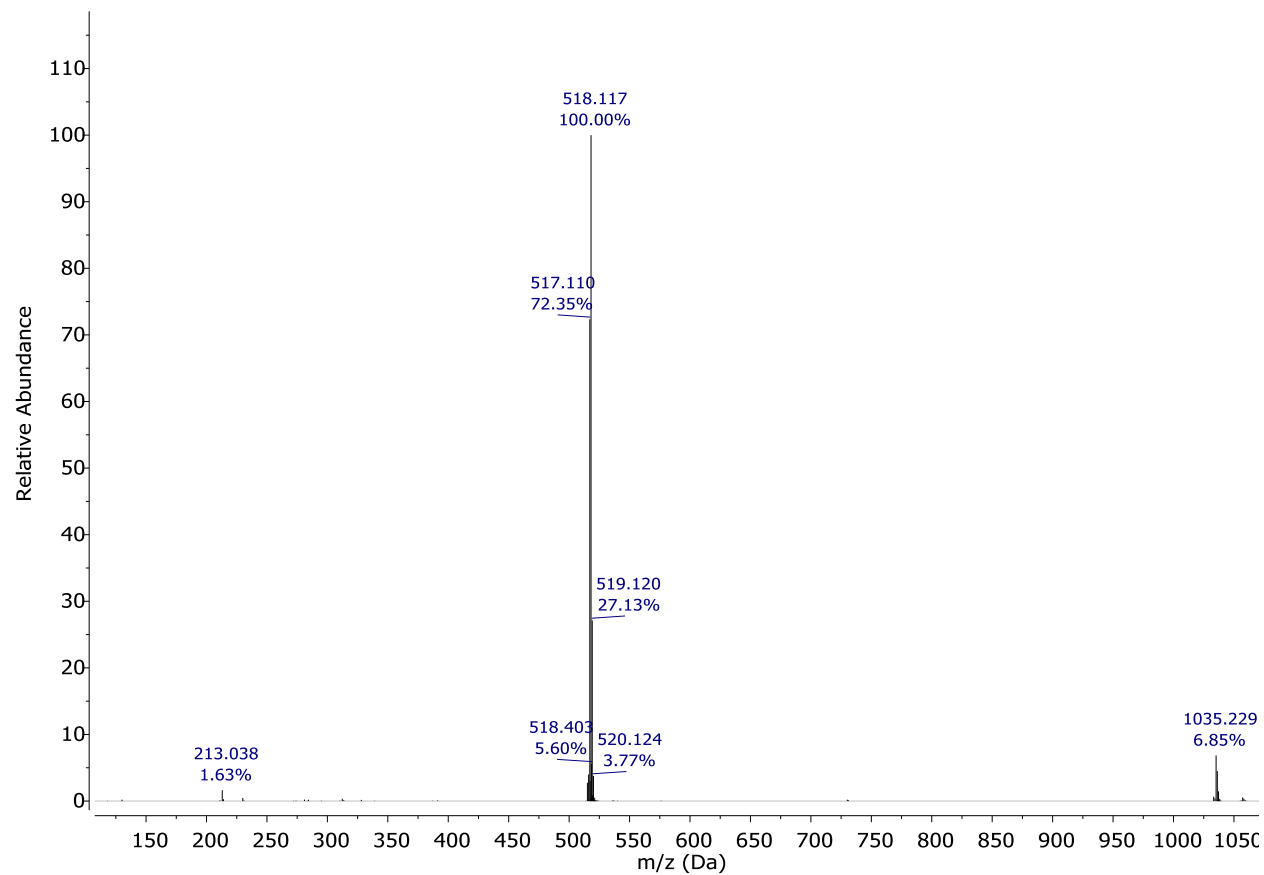

**Figure S8.** Mass Spectrum scan for **1-FcAQ** using an ESI-ToF in positive mode.

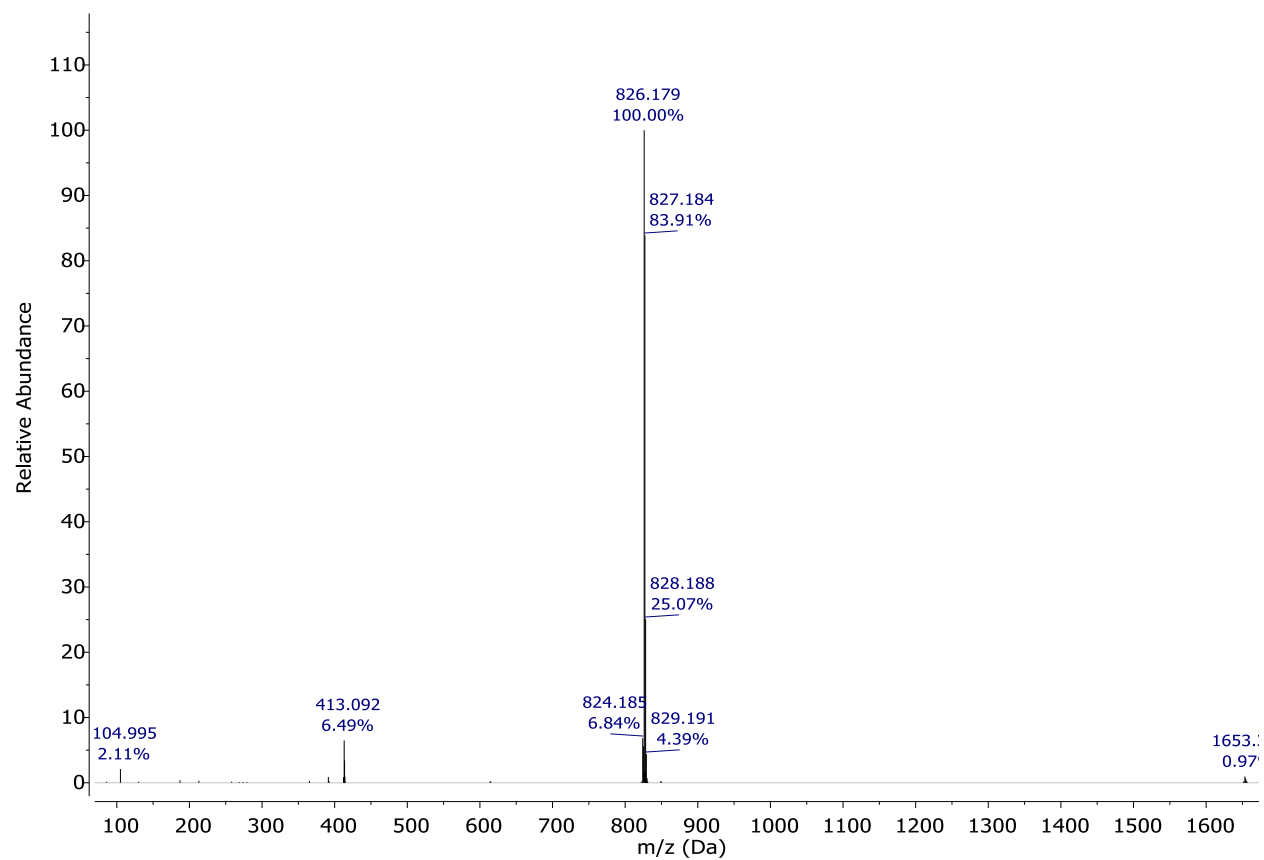

**Figure S9.** Mass Spectrum scan for **1,2-DiFcAQ** using an ESI-ToF in positive mode.

## EPR Spin Trapping

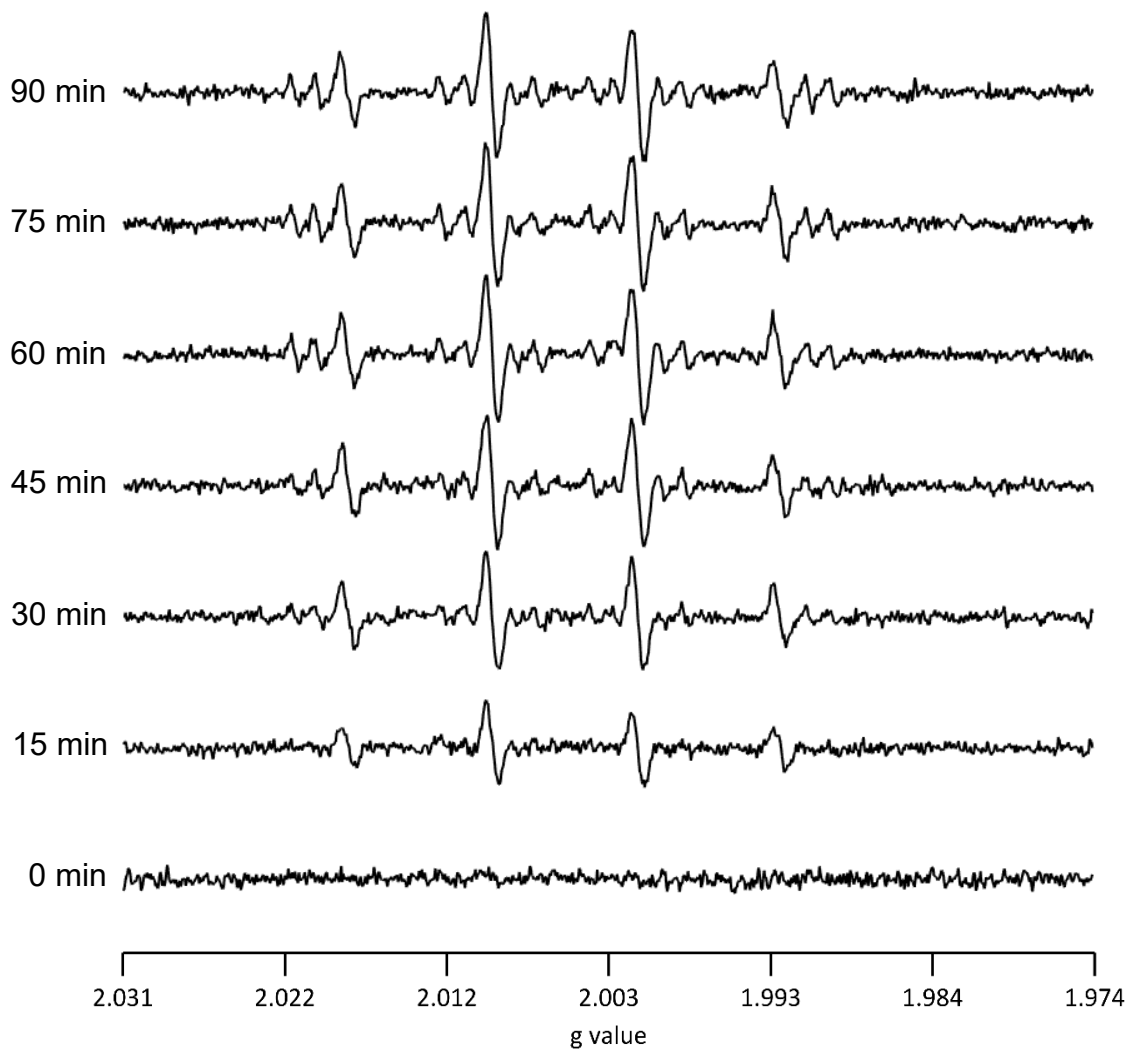

**Figure S10.** Time dependent spin trapping experiment using 100  $\mu\text{M}$  of **1,2-DiFcAQ** with 50 mM DMPO, 10% MeCN and 100  $\mu\text{M}$  of  $\text{H}_2\text{O}_2$  as a radical initiator in Milli-Q<sup>®</sup>  $\text{H}_2\text{O}$ .

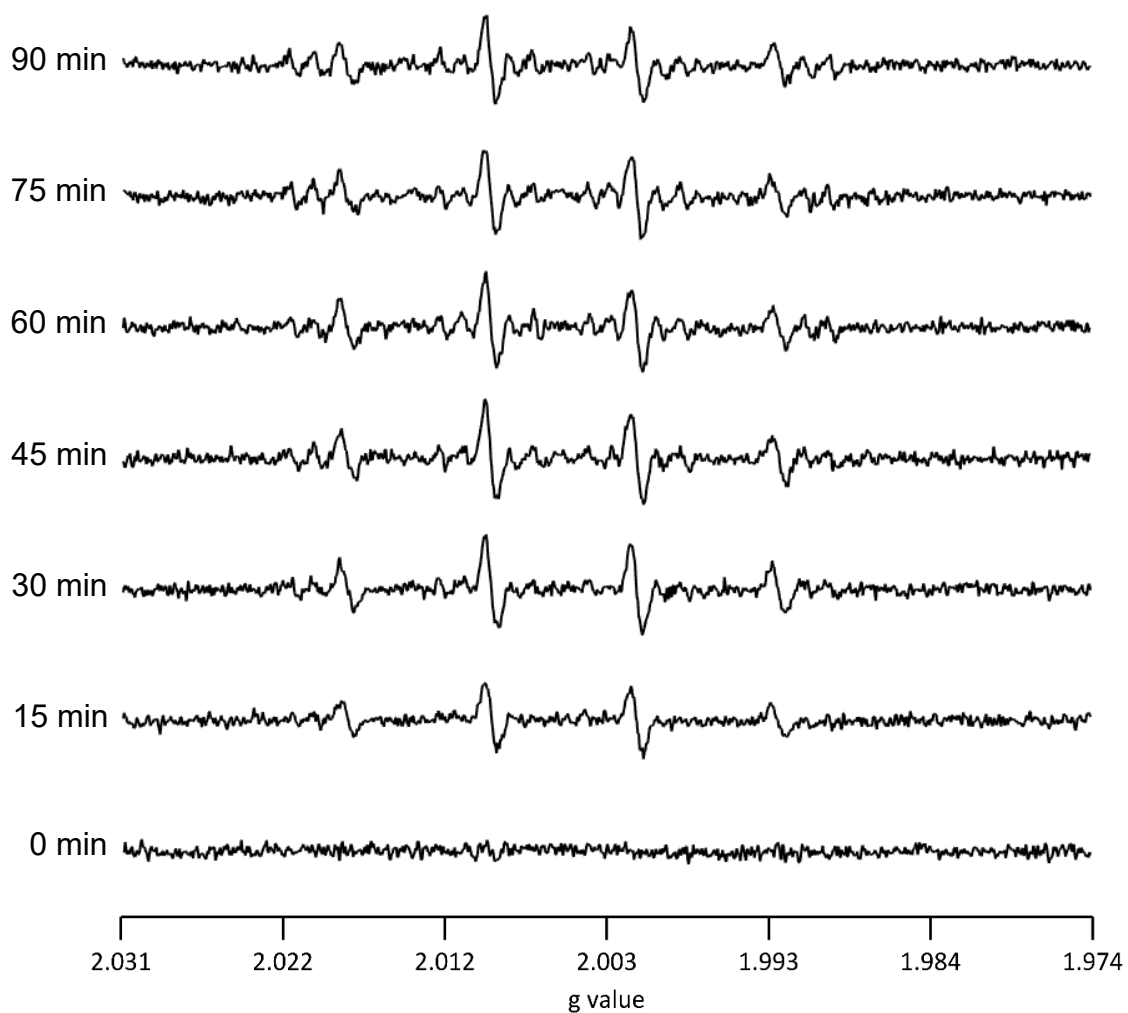

**Figure S11.** Time dependent spin trapping experiment using 100  $\mu\text{M}$  of **4-FcC** with 50 mM DMPO, 10% MeCN and 100  $\mu\text{M}$  of  $\text{H}_2\text{O}_2$  as a radical initiator in Milli-Q<sup>®</sup>  $\text{H}_2\text{O}$ .

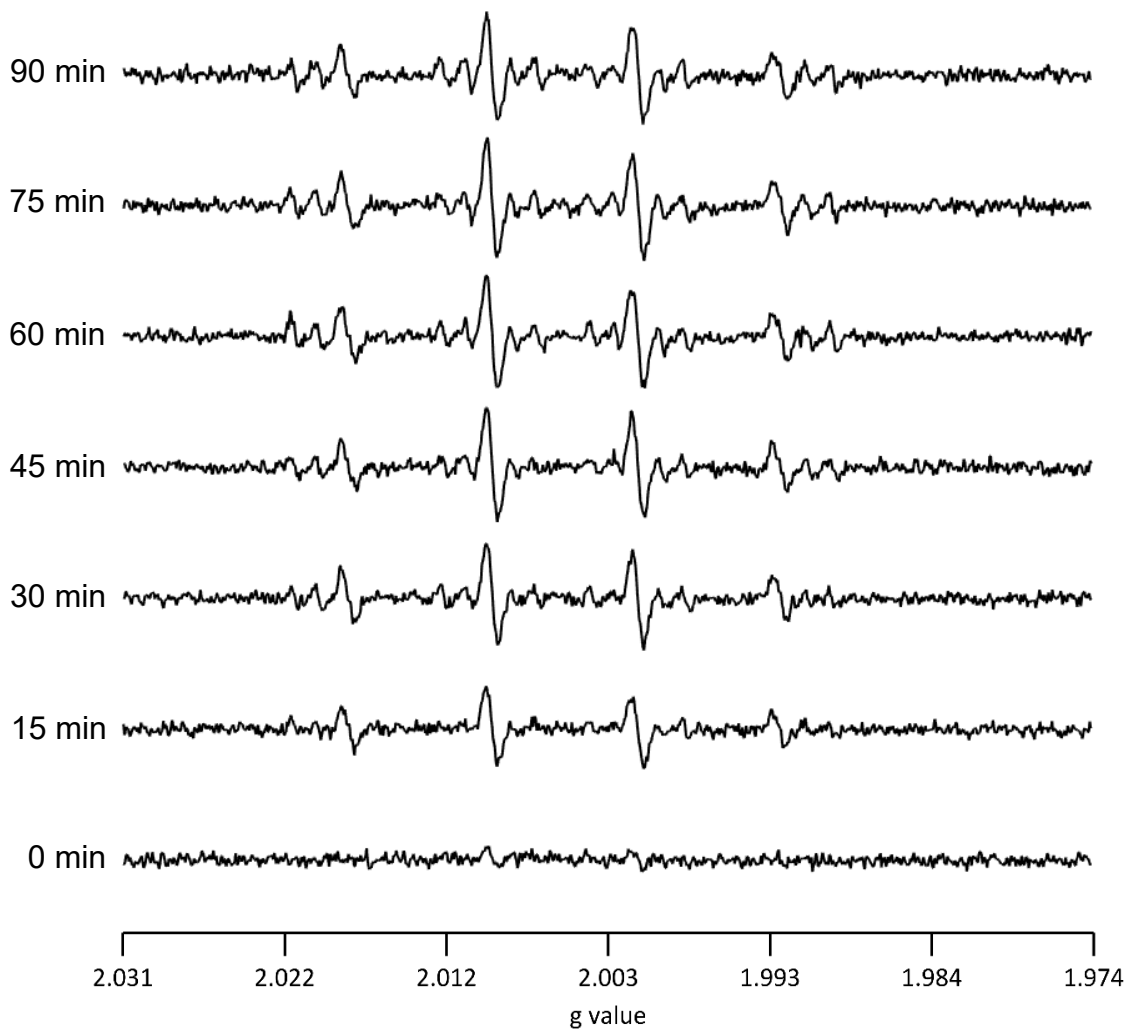

**Figure S12.** Time dependent spin trapping experiment using 100  $\mu\text{M}$  of **1-FcAQ** with 50 mM DMPO, 10% MeCN and 100  $\mu\text{M}$  of  $\text{H}_2\text{O}_2$  as a radical initiator in Milli-Q®  $\text{H}_2\text{O}$ .



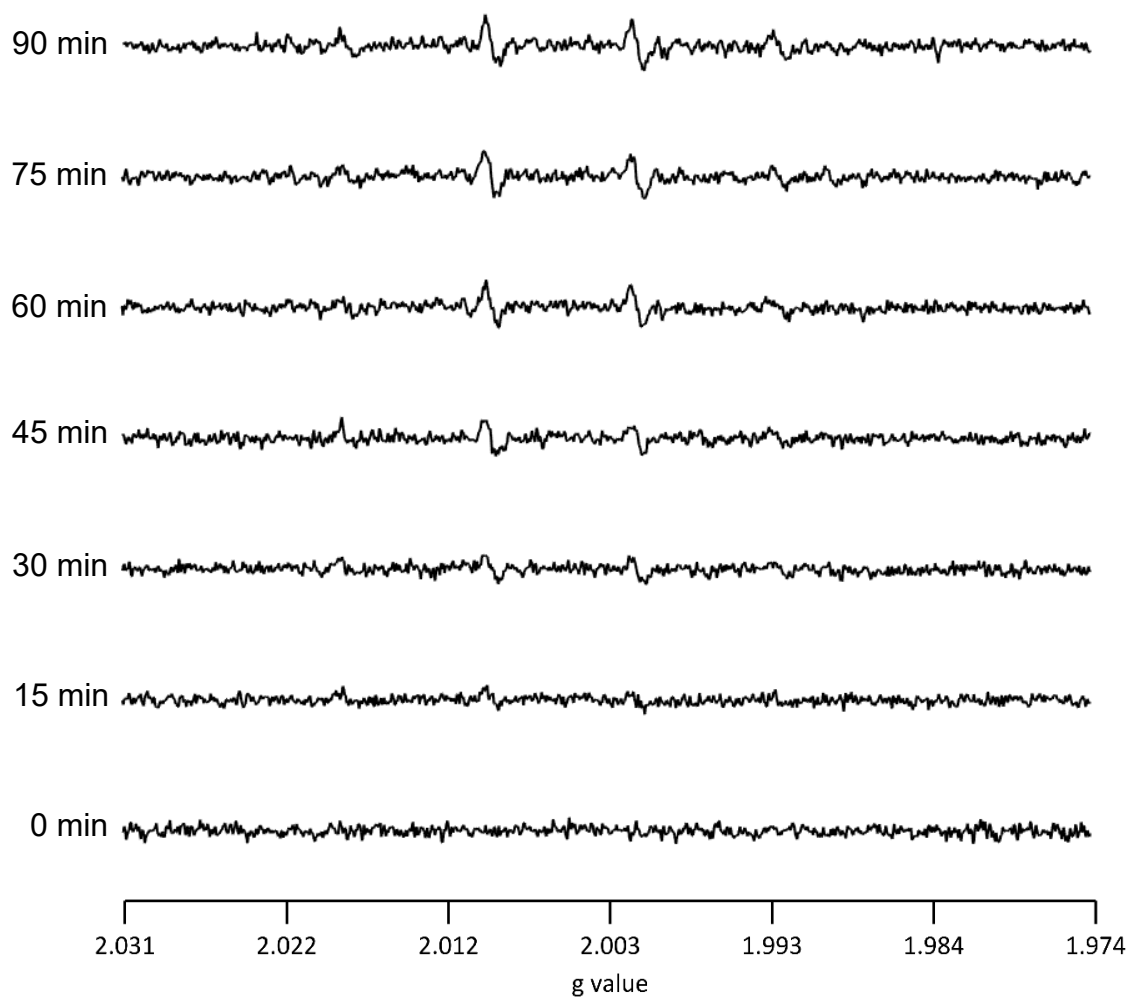

**Figure S13.** Time dependent spin trapping experiment control using 50 mM DMPO, 10% MeCN and 100  $\mu$ M of  $\text{H}_2\text{O}_2$  in Milli-Q<sup>®</sup>  $\text{H}_2\text{O}$ .

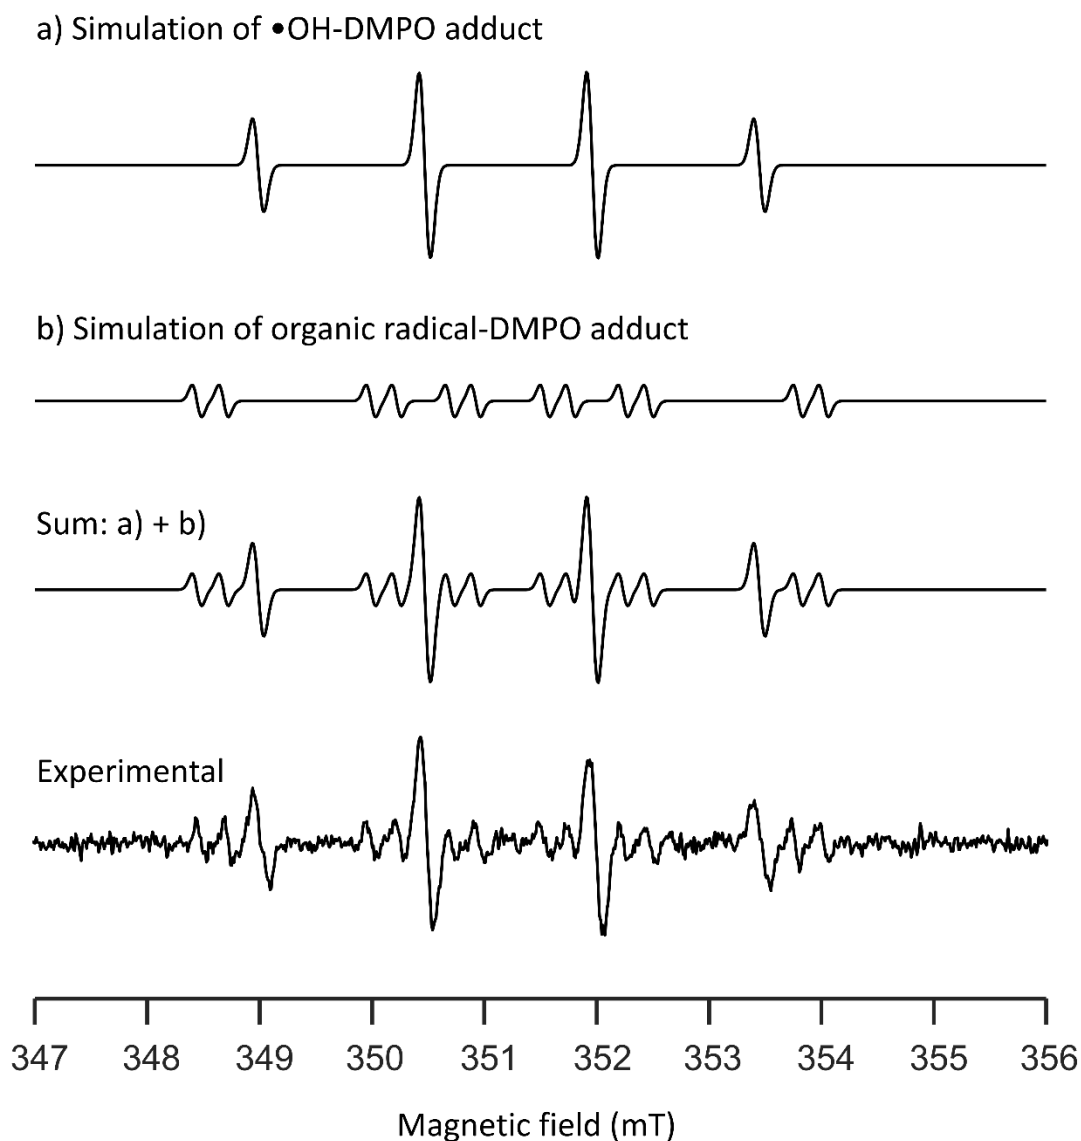

**Figure S14.** Deconvolution of EPR spectrum from DMSO spin-trapping experiment with **4-FcC** at 90 min timepoint. Solution: 100  $\mu\text{M}$  **4-FcC**, 50 mM DMPO, 10% MeCN and 100  $\mu\text{M}$  of  $\text{H}_2\text{O}_2$  as a radical initiator in Milli-Q<sup>®</sup>  $\text{H}_2\text{O}$ . Simulation performed using the Matlab-based Toolbox EasySpin.<sup>5</sup> Simulation parameters:

(i)  $\bullet\text{OH}$ -DMPO radical adduct:  $g = 2.0052$ ,  $a(^{14}\text{N}) = 1.49$  mT,  $a(^1\text{H}) = 1.49$  mT, peak-to-peak linewidth = 0.1 mT

(ii) organic radical-DMPO adduct:  $g = 2.0052$ .  $a(^{14}\text{N}) = 1.55$  mT,  $a(^1\text{H})_1 = 2.25$  mT,  $a(^1\text{H})_2 = 0.23$  mT, peak-to-peak line width = 0.85 mT

Spectral weighting,  $\bullet\text{OH}$ -DMPO radical adduct : organic radical-DMPO adduct = 2:1

## Antibacterial Screening Results

**Table S1.** Antibacterial screening results for **1,2-DiFcAQ**, **1-FcAQ**, **4-FcC** and positive control, enrofloxacin. Listed values are MIC<sub>90</sub> in  $\mu\text{M}$ .

| <b>Strain</b>                | <b>1,2-DiFcAQ</b> | <b>1-FcAQ</b> | <b>4-FcC</b> | <b>Enrofloxacin</b> |
|------------------------------|-------------------|---------------|--------------|---------------------|
| <i>E. coli</i>               | >256              | >256          | >256         | 0.06                |
| <i>K. aerogenes</i>          | >256              | >256          | >256         | 0.25                |
| <i>K. pneumoniae</i>         | >256              | >256          | >256         | 3.33                |
| <i>P. alcalifaciens</i>      | >256              | >256          | >256         | 0.25                |
| <i>S. enterica</i>           | >256              | >256          | >256         | 0.06                |
| <i>S. sonnei</i>             | >256              | >256          | >256         | 0.10                |
| <i>Y. pseudotuberculosis</i> | >256              | >256          | >256         | 0.06                |
| <i>A. baumannii</i>          | >256              | >256          | >256         | 0.83                |
| <i>P. aeruginosa</i>         | >256              | >256          | >256         | 3.00                |
| <i>V. cholerae</i>           | >256              | >256          | >256         | 0.01                |
| <i>O. anthropi</i>           | >256              | >256          | >256         | 0.21                |
| <i>B. subtilis</i>           | >256              | >256          | >256         | 0.33                |
| <i>L. ivanovii</i>           | >256              | >256          | >256         | 4.00                |
| <b>MSSA</b>                  | >256              | >256          | >256         | 0.67                |
| <b>MRSA</b>                  | >256              | >256          | >256         | 13.3                |
| <i>S. epidermidis</i>        | >256              | >256          | >256         | 3.33                |
| <i>E. faecium</i>            | >256              | >256          | >256         | 3.33                |
| <i>E. faecalis</i>           | >256              | >256          | >256         | 3.33                |
| <i>S. pneumoniae</i>         | >256              | >256          | >256         | 3.33                |

**Table S2.** Antibacterial screening growth conditions and strain designations.

| Strain Name                                          | Strain Designation | BSL | Growth Medium | Growth Condition             |
|------------------------------------------------------|--------------------|-----|---------------|------------------------------|
| <b>Gram-Positive</b>                                 |                    |     |               |                              |
| <i>Bacillus subtilis</i>                             | ATCC 6051          | 1   | NB            | 37 °C                        |
| <i>Enterococcus faecalis</i>                         | ATCC 29212         | 2   | BHI           | 37 °C                        |
| <i>Enterococcus faecium</i>                          | ATCC 6569          | 2   | BHI           | 37 °C                        |
| <i>Listeria ivanovii</i>                             | BAA-139            | 1   | BHI-A;<br>HTM | 37 °C; 5%<br>CO <sub>2</sub> |
| <i>Staphylococcus aureus</i> (Methicillin-Resistant) | BAA-44             | 2   | TSB           | 37 °C                        |
| <i>Staphylococcus aureus</i> (Methicillin-Sensitive) | ATCC 29213         | 2   | TSB           | 37 °C                        |
| <i>Staphylococcus epidermidis</i>                    | ATCC 14990         | 1   | TSB           | 37 °C                        |
| <i>Streptococcus pneumoniae</i>                      | ATCC 49619         | 2   | BHI           | 37 °C; 5%<br>CO <sub>2</sub> |
| <b>Gram-Negative</b>                                 |                    |     |               |                              |
| <i>Acinetobacter baumannii</i>                       | ATCC 19606         | 2   | TSB           | 37 °C                        |
| <i>Escherichia coli</i>                              | K-12 MG1655        | 1   | NB            | 37 °C                        |
| <i>Klebsiella aerogenes</i>                          | ATCC 35029         | 1   | NB            | 37 °C                        |
| <i>Klebsiella pneumoniae</i>                         | ATCC 700603        | 2   | NB            | 37 °C                        |
| <i>Ochrobactrum anthropi</i>                         | ATCC 49687         | 1   | TSB           | 37 °C                        |
| <i>Providencia alcalifaciens</i>                     | ATCC 9886          | 1   | TSB           | 37 °C                        |
| <i>Pseudomonas aeruginosa</i>                        | ATCC 27853         | 2   | TSB           | 37 °C                        |
| <i>Salmonella enterica</i>                           | ATCC 13311         | 2   | NB            | 37 °C                        |
| <i>Shigella sonnei</i>                               | ATCC 25931         | 2   | NB            | 37 °C                        |
| <i>Vibrio cholerae</i>                               | A1552 El Tor       | 2   | TSB           | 37 °C                        |
| <i>Yersinia pseudotuberculosis</i>                   | ATCC 6904          | 2   | BHI           | 37 °C                        |

## X-ray Crystallography

**Table S3.** Crystal data and details of data collection and refinement for **1-FcAQ**.

|                                             |                                                                 |
|---------------------------------------------|-----------------------------------------------------------------|
| Identification code                         | AH_1HAQ_Fc_0m_a                                                 |
| Empirical formula                           | C <sub>29</sub> H <sub>23</sub> FeN <sub>3</sub> O <sub>3</sub> |
| Formula weight                              | 517.35                                                          |
| Temperature/K                               | 150(2)                                                          |
| Crystal system                              | triclinic                                                       |
| Space group                                 | P-1                                                             |
| a/Å                                         | 9.5846(11)                                                      |
| b/Å                                         | 10.9289(12)                                                     |
| c/Å                                         | 12.3271(14)                                                     |
| α/°                                         | 96.266(2)                                                       |
| β/°                                         | 104.325(2)                                                      |
| γ/°                                         | 106.238(2)                                                      |
| Volume/Å <sup>3</sup>                       | 1178.9(2)                                                       |
| Z                                           | 2                                                               |
| ρ <sub>calc</sub> /cm <sup>3</sup>          | 1.455                                                           |
| μ/mm <sup>-1</sup>                          | 0.678                                                           |
| F(000)                                      | 536.0                                                           |
| Crystal size/mm                             | 0.142 × 0.134 × 0.060                                           |
| Radiation                                   | MoKα (λ = 0.71073)                                              |
| 2θ range for data collection/°              | 3.474 to 50.728                                                 |
| Index ranges                                | -11 ≤ h ≤ 11, -13 ≤ k ≤ 13, -14 ≤ l ≤ 14                        |
| Reflections collected                       | 12982                                                           |
| Independent reflections                     | 4299 [R <sub>int</sub> = 0.0466, R <sub>sigma</sub> = 0.0604]   |
| Data/restraints/parameters                  | 4299/18/382                                                     |
| Goodness-of-fit on F <sup>2</sup>           | 1.019                                                           |
| Final R indexes [I >= 2σ (I)]               | R <sub>1</sub> = 0.0486, wR <sub>2</sub> = 0.0887               |
| Final R indexes [all data]                  | R <sub>1</sub> = 0.0813, wR <sub>2</sub> = 0.0977               |
| Largest diff. peak/hole / e Å <sup>-3</sup> | 0.36/-0.35                                                      |

**Table S4.** Fractional Atomic Coordinates ( $\times 10^4$ ) and Equivalent Isotropic Displacement Parameters ( $\text{\AA}^2 \times 10^3$ ) for **1-FcAQ**.  $U_{\text{eq}}$  defined as 1/3 of the trace of the orthogonalised  $U_{\text{ij}}$  tensor.

| Atom | x          | y          | z          | $U_{\text{eq}}$ |
|------|------------|------------|------------|-----------------|
| Fe1  | -2143.5(5) | 7141.0(4)  | 935.9(4)   | 37.67(16)       |
| O1   | 5185(2)    | 7073.9(17) | 4195.5(16) | 43.5(5)         |
| O2   | 4784(2)    | 4904.7(19) | 2885.3(17) | 53.8(6)         |
| O3   | 9382(3)    | 4139(2)    | 5919.7(19) | 68.6(7)         |
| N3   | 3211(3)    | 9274(2)    | 3184(2)    | 54.4(7)         |
| C1   | 5412(4)    | 2619(3)    | 2440(3)    | 47.2(8)         |
| C2   | 5776(4)    | 1506(3)    | 2237(3)    | 57.5(9)         |
| C3   | 6973(4)    | 1294(3)    | 3001(3)    | 60.4(10)        |
| C4   | 7787(4)    | 2199(3)    | 3975(3)    | 56.0(9)         |
| C5   | 7426(3)    | 3337(3)    | 4193(3)    | 40.7(7)         |
| C6   | 6228(3)    | 3548(3)    | 3418(2)    | 36.6(7)         |
| C7   | 5812(3)    | 4753(3)    | 3610(2)    | 34.7(7)         |
| C8   | 6687(3)    | 5724(3)    | 4669(2)    | 32.8(7)         |
| C9   | 7899(3)    | 5506(3)    | 5456(2)    | 38.6(7)         |
| C10  | 8316(4)    | 4306(3)    | 5241(3)    | 44.8(8)         |
| C11  | 6382(3)    | 6890(3)    | 4934(2)    | 35.5(7)         |
| C12  | 7272(3)    | 7797(3)    | 5918(2)    | 43.3(8)         |
| C13  | 8442(4)    | 7539(3)    | 6651(3)    | 53.8(9)         |
| C14  | 8755(4)    | 6405(3)    | 6430(3)    | 50.2(8)         |
| C15  | 4988(3)    | 8322(3)    | 4333(2)    | 38.6(7)         |
| C36  | 1730(20)   | 7410(20)   | -355(16)   | 52(6)           |
| C37  | -490(20)   | 6792(17)   | 477(17)    | 21(5)           |
| C30  | 964(14)    | 7810(20)   | 505(12)    | 33(5)           |
| N4   | 2090(30)   | 8210(20)   | 1680(20)   | 30(5)           |
| N5   | 2100(30)   | 9310(20)   | 2230(30)   | 43(6)           |
| C35  | 3010(30)   | 7630(20)   | 2200(20)   | 27(5)           |
| C16  | 3744(3)    | 8267(3)    | 3314(2)    | 36.5(7)         |
| C31  | 1269(7)    | 7935(7)    | -286(6)    | 53.2(19)        |
| C22  | -530(6)    | 6393(7)    | 541(5)     | 30.3(13)        |
| C18  | 1086(4)    | 7031(6)    | 539(4)     | 34.9(16)        |
| N1   | 2073(11)   | 7683(7)    | 1694(8)    | 36.9(17)        |
| N2   | 2208(9)    | 8894(8)    | 2158(10)   | 53(2)           |
| C17  | 3025(10)   | 7238(7)    | 2412(6)    | 31.4(16)        |
| C20  | -2542(4)   | 5231(3)    | 977(3)     | 47.6(8)         |
| C21  | -971(4)    | 5897(3)    | 1392(3)    | 45.9(8)         |
| C23  | -1831(3)   | 6167(3)    | -441(2)    | 40.8(7)         |
| C24  | -3069(3)   | 5394(3)    | -152(3)    | 41.1(8)         |
| C25  | -2612(4)   | 8780(3)    | 556(3)     | 64.7(10)        |
| C26  | -3799(4)   | 7987(3)    | 884(4)     | 63.2(10)        |
| C27  | -3205(5)   | 7800(4)    | 1995(4)    | 73.9(11)        |
| C28  | -1624(5)   | 8500(4)    | 2350(3)    | 76.0(12)        |
| C29  | -1272(4)   | 9097(3)    | 1455(4)    | 70.1(12)        |

**Table S5.** Anisotropic Displacement Parameters ( $\text{\AA}^2 \times 10^3$ ) for **1-FcAQ**. The Anisotropic displacement factor exponent takes the form:  $-2\pi^2[h^2a^{*2}U_{11}+2hka^*b^*U_{12}+\dots]$

| Atom | U <sub>11</sub> | U <sub>22</sub> | U <sub>33</sub> | U <sub>23</sub> | U <sub>13</sub> | U <sub>12</sub> |
|------|-----------------|-----------------|-----------------|-----------------|-----------------|-----------------|
| Fe1  | 34.2(3)         | 33.3(2)         | 40.6(3)         | -1.54(18)       | 6.45(19)        | 10.30(18)       |
| O1   | 42.0(12)        | 35.8(11)        | 42.6(13)        | -7.0(9)         | -2.8(10)        | 15.7(9)         |
| O2   | 64.2(15)        | 44.8(12)        | 40.6(13)        | -4.8(10)        | -9.5(12)        | 25.4(11)        |
| O3   | 76.3(17)        | 81.9(17)        | 51.9(15)        | 15.1(13)        | -0.5(13)        | 47.8(14)        |
| N3   | 41.9(16)        | 49.8(16)        | 56.3(19)        | -4.7(14)        | -9.9(15)        | 17.7(13)        |
| C1   | 53(2)           | 35.9(17)        | 48(2)           | 2.6(15)         | 11.2(17)        | 12.1(15)        |
| C2   | 66(2)           | 44(2)           | 61(2)           | -1.4(17)        | 21(2)           | 18.2(18)        |
| C3   | 76(3)           | 40(2)           | 78(3)           | 7(2)            | 37(2)           | 28.1(19)        |
| C4   | 58(2)           | 59(2)           | 65(2)           | 18(2)           | 24(2)           | 32.1(19)        |
| C5   | 48.7(19)        | 40.5(17)        | 42.8(19)        | 13.4(15)        | 22.2(16)        | 19.6(15)        |
| C6   | 41.7(17)        | 34.1(16)        | 36.5(18)        | 7.6(14)         | 17.6(15)        | 10.3(14)        |
| C7   | 39.5(17)        | 33.5(16)        | 30.2(16)        | 5.5(13)         | 10.7(14)        | 9.8(13)         |
| C8   | 34.1(16)        | 35.2(16)        | 27.0(16)        | 4.0(13)         | 8.6(13)         | 8.8(13)         |
| C9   | 38.4(17)        | 43.9(18)        | 33.7(18)        | 8.0(14)         | 9.7(14)         | 13.8(14)        |
| C10  | 51(2)           | 55(2)           | 37.2(19)        | 17.2(16)        | 14.1(16)        | 25.5(16)        |
| C11  | 31.6(16)        | 38.4(17)        | 31.7(17)        | 4.8(14)         | 5.1(14)         | 8.1(13)         |
| C12  | 47.3(19)        | 38.2(17)        | 39.0(19)        | -1.1(14)        | 8.3(16)         | 12.1(15)        |
| C13  | 52(2)           | 55(2)           | 37.0(19)        | -5.2(16)        | -5.1(16)        | 11.5(17)        |
| C14  | 51(2)           | 55(2)           | 38.2(19)        | 3.6(16)         | -0.9(16)        | 20.8(17)        |
| C15  | 36.2(16)        | 32.3(16)        | 41.9(18)        | -2.8(13)        | 6.3(14)         | 10.6(13)        |
| C36  | 41(10)          | 77(13)          | 36(9)           | -14(9)          | 8(8)            | 29(8)           |
| C37  | 21(5)           | 21(5)           | 21(5)           | 4.0(14)         | 6.1(17)         | 6.6(18)         |
| C30  | 32(7)           | 40(11)          | 29(8)           | 9(7)            | 6(6)            | 16(6)           |
| N4   | 28(7)           | 34(17)          | 27(9)           | -5(12)          | 5(6)            | 14(13)          |
| N5   | 37(7)           | 40(10)          | 49(8)           | -1(8)           | -4(6)           | 27(7)           |
| C35  | 35(8)           | 17(8)           | 30(9)           | -5(6)           | 7(7)            | 14(8)           |
| C16  | 25.8(15)        | 37.3(17)        | 38.9(18)        | -4.8(14)        | 4.0(14)         | 7.7(13)         |
| C31  | 37(3)           | 63(4)           | 51(4)           | 15(3)           | 11(3)           | 3(3)            |
| C22  | 31(3)           | 20(3)           | 35(3)           | 1(2)            | 2.8(18)         | 9(2)            |
| C18  | 32(2)           | 30(3)           | 34(3)           | -4(2)           | -1.3(19)        | 11(2)           |
| N1   | 30(3)           | 27(4)           | 45(3)           | -5(4)           | 1(2)            | 9(4)            |
| N2   | 49(3)           | 40(6)           | 66(5)           | -1(4)           | -7(3)           | 34(4)           |
| C17  | 29(3)           | 28(3)           | 39(3)           | 9(3)            | 8(2)            | 13(3)           |
| C20  | 55(2)           | 34.0(17)        | 49(2)           | 6.3(15)         | 14.7(17)        | 6.5(15)         |
| C21  | 52(2)           | 46.8(19)        | 36.2(19)        | 5.6(16)         | 3.0(16)         | 20.5(16)        |
| C23  | 35.5(17)        | 48.2(18)        | 31.6(17)        | -0.5(14)        | 2.8(14)         | 11.7(15)        |

**Table S6.** Bond Lengths for **1-FcAQ**.

| Atom | Atom | Length/Å  | Atom | Atom | Length/Å  |
|------|------|-----------|------|------|-----------|
| Fe1  | C37  | 1.93(2)   | C9   | C14  | 1.373(4)  |
| Fe1  | C22  | 2.071(6)  | C11  | C12  | 1.390(4)  |
| Fe1  | C20  | 2.023(3)  | C12  | C13  | 1.373(4)  |
| Fe1  | C21  | 2.034(3)  | C13  | C14  | 1.369(4)  |
| Fe1  | C23  | 2.035(3)  | C15  | C16  | 1.484(4)  |
| Fe1  | C24  | 2.033(3)  | C36  | C30  | 1.52(3)   |
| Fe1  | C25  | 2.039(3)  | C37  | C30  | 1.51(2)   |
| Fe1  | C26  | 2.040(3)  | C37  | C21  | 1.641(19) |
| Fe1  | C27  | 2.029(4)  | C37  | C23  | 1.422(19) |
| Fe1  | C28  | 2.021(3)  | C30  | N4   | 1.51(3)   |
| Fe1  | C29  | 2.028(3)  | N4   | N5   | 1.31(3)   |
| O1   | C11  | 1.355(3)  | N4   | C35  | 1.32(3)   |
| O1   | C15  | 1.427(3)  | C35  | C16  | 1.38(2)   |
| O2   | C7   | 1.218(3)  | C16  | C17  | 1.375(7)  |
| O3   | C10  | 1.221(3)  | C31  | C18  | 1.501(10) |
| N3   | N5   | 1.39(3)   | C22  | C18  | 1.511(7)  |
| N3   | C16  | 1.345(3)  | C22  | C21  | 1.338(7)  |
| N3   | N2   | 1.325(10) | C22  | C23  | 1.447(6)  |
| C1   | C2   | 1.371(4)  | C18  | N1   | 1.472(10) |
| C1   | C6   | 1.385(4)  | N1   | N2   | 1.341(8)  |
| C2   | C3   | 1.385(5)  | N1   | C17  | 1.339(11) |
| C3   | C4   | 1.369(5)  | C20  | C21  | 1.408(4)  |
| C4   | C5   | 1.397(4)  | C20  | C24  | 1.408(4)  |
| C5   | C6   | 1.392(4)  | C23  | C24  | 1.401(4)  |
| C5   | C10  | 1.473(4)  | C25  | C26  | 1.401(5)  |
| C6   | C7   | 1.491(4)  | C25  | C29  | 1.400(5)  |
| C7   | C8   | 1.480(4)  | C26  | C27  | 1.407(5)  |
| C8   | C9   | 1.413(4)  | C27  | C28  | 1.422(5)  |
| C8   | C11  | 1.408(4)  | C28  | C29  | 1.406(5)  |
| C9   | C10  | 1.490(4)  |      |      |           |



**Table S7.** Bond Angles for **1-FcAQ**.

| Atom | Atom | Atom | Angle/°    | Atom | Atom | Atom | Angle/°   |
|------|------|------|------------|------|------|------|-----------|
| C37  | Fe1  | C20  | 77.5(5)    | C14  | C9   | C10  | 117.8(3)  |
| C37  | Fe1  | C21  | 48.8(5)    | O3   | C10  | C5   | 121.0(3)  |
| C37  | Fe1  | C23  | 41.9(6)    | O3   | C10  | C9   | 120.3(3)  |
| C37  | Fe1  | C24  | 74.3(5)    | C5   | C10  | C9   | 118.6(3)  |
| C37  | Fe1  | C25  | 116.6(5)   | O1   | C11  | C8   | 117.0(2)  |
| C37  | Fe1  | C26  | 154.7(6)   | O1   | C11  | C12  | 122.3(3)  |
| C37  | Fe1  | C27  | 157.3(6)   | C12  | C11  | C8   | 120.8(3)  |
| C37  | Fe1  | C28  | 117.8(6)   | C13  | C12  | C11  | 119.6(3)  |
| C37  | Fe1  | C29  | 100.1(5)   | C14  | C13  | C12  | 121.2(3)  |
| C20  | Fe1  | C22  | 65.6(2)    | C13  | C14  | C9   | 120.0(3)  |
| C20  | Fe1  | C21  | 40.62(12)  | O1   | C15  | C16  | 105.4(2)  |
| C20  | Fe1  | C23  | 68.06(12)  | C30  | C37  | Fe1  | 124.9(11) |
| C20  | Fe1  | C24  | 40.61(11)  | C30  | C37  | C21  | 133.0(14) |
| C20  | Fe1  | C25  | 157.73(14) | C21  | C37  | Fe1  | 68.9(8)   |
| C20  | Fe1  | C26  | 121.58(15) | C23  | C37  | Fe1  | 73.0(8)   |
| C20  | Fe1  | C27  | 106.05(15) | C23  | C37  | C30  | 130.1(15) |
| C20  | Fe1  | C29  | 159.69(15) | C23  | C37  | C21  | 96.4(11)  |
| C21  | Fe1  | C22  | 38.0(2)    | C37  | C30  | C36  | 113.8(16) |
| C21  | Fe1  | C23  | 68.42(12)  | N4   | C30  | C36  | 109.2(15) |
| C21  | Fe1  | C25  | 161.09(14) | N4   | C30  | C37  | 111.8(16) |
| C21  | Fe1  | C26  | 156.28(15) | N5   | N4   | C30  | 113(2)    |
| C23  | Fe1  | C22  | 41.26(16)  | N5   | N4   | C35  | 118(2)    |
| C23  | Fe1  | C25  | 109.84(14) | C35  | N4   | C30  | 130(2)    |
| C23  | Fe1  | C26  | 125.33(14) | N4   | N5   | N3   | 92.1(18)  |
| C24  | Fe1  | C22  | 66.94(17)  | N4   | C35  | C16  | 110.5(17) |
| C24  | Fe1  | C21  | 68.42(12)  | N3   | C16  | C15  | 121.6(2)  |
| C24  | Fe1  | C23  | 40.29(11)  | N3   | C16  | C35  | 93.9(10)  |
| C24  | Fe1  | C25  | 123.29(13) | N3   | C16  | C17  | 112.6(4)  |
| C24  | Fe1  | C26  | 108.39(13) | C35  | C16  | C15  | 142.5(11) |
| C25  | Fe1  | C22  | 128.5(2)   | C17  | C16  | C15  | 125.8(4)  |
| C25  | Fe1  | C26  | 40.16(14)  | C18  | C22  | Fe1  | 132.2(4)  |
| C26  | Fe1  | C22  | 164.2(2)   | C21  | C22  | Fe1  | 69.5(3)   |
| C27  | Fe1  | C22  | 155.0(2)   | C21  | C22  | C18  | 126.4(4)  |
| C27  | Fe1  | C21  | 120.14(16) | C21  | C22  | C23  | 110.3(4)  |
| C27  | Fe1  | C23  | 160.37(15) | C23  | C22  | Fe1  | 68.0(3)   |
| C27  | Fe1  | C24  | 123.21(15) | C23  | C22  | C18  | 123.1(5)  |
| C27  | Fe1  | C25  | 68.09(17)  | C31  | C18  | C22  | 115.3(5)  |
| C27  | Fe1  | C26  | 40.47(15)  | N1   | C18  | C31  | 110.5(5)  |
| C28  | Fe1  | C22  | 121.61(19) | N1   | C18  | C22  | 111.4(5)  |
| C28  | Fe1  | C20  | 122.62(17) | N2   | N1   | C18  | 123.0(8)  |
| C28  | Fe1  | C21  | 106.13(14) | C17  | N1   | C18  | 127.6(6)  |
| C28  | Fe1  | C23  | 157.89(16) | C17  | N1   | N2   | 109.3(8)  |
| C28  | Fe1  | C24  | 159.59(17) | N3   | N2   | N1   | 111.1(7)  |
| C28  | Fe1  | C25  | 68.00(16)  | N1   | C17  | C16  | 103.2(6)  |
| C28  | Fe1  | C26  | 68.23(15)  | C21  | C20  | Fe1  | 70.08(17) |
| C28  | Fe1  | C27  | 41.11(16)  | C24  | C20  | Fe1  | 70.08(16) |

**Table S7.** Bond Angles for **1-FcAQ**.

| Atom | Atom | Atom | Angle/°    | Atom | Atom | Atom | Angle/°   |
|------|------|------|------------|------|------|------|-----------|
| C28  | Fe1  | C29  | 40.63(15)  | C24  | C20  | C21  | 108.6(3)  |
| C29  | Fe1  | C22  | 110.5(2)   | C37  | C21  | Fe1  | 62.3(7)   |
| C29  | Fe1  | C21  | 123.74(13) | C22  | C21  | Fe1  | 72.5(3)   |
| C29  | Fe1  | C23  | 123.34(16) | C22  | C21  | C20  | 107.6(3)  |
| C29  | Fe1  | C24  | 158.58(16) | C20  | C21  | Fe1  | 69.30(17) |
| C29  | Fe1  | C25  | 40.27(13)  | C20  | C21  | C37  | 108.2(7)  |
| C29  | Fe1  | C26  | 67.89(15)  | C37  | C23  | Fe1  | 65.0(8)   |
| C29  | Fe1  | C27  | 68.62(17)  | C22  | C23  | Fe1  | 70.7(3)   |
| C11  | O1   | C15  | 118.5(2)   | C24  | C23  | Fe1  | 69.80(17) |
| C16  | N3   | N5   | 124.8(10)  | C24  | C23  | C37  | 116.0(8)  |
| N2   | N3   | C16  | 103.6(4)   | C24  | C23  | C22  | 105.3(4)  |
| C2   | C1   | C6   | 120.6(3)   | C20  | C24  | Fe1  | 69.32(17) |
| C1   | C2   | C3   | 120.6(3)   | C23  | C24  | Fe1  | 69.91(16) |
| C4   | C3   | C2   | 119.6(3)   | C23  | C24  | C20  | 107.9(3)  |
| C3   | C4   | C5   | 120.3(3)   | C26  | C25  | Fe1  | 69.96(19) |
| C4   | C5   | C10  | 119.8(3)   | C29  | C25  | Fe1  | 69.45(19) |
| C6   | C5   | C4   | 119.8(3)   | C29  | C25  | C26  | 108.4(4)  |
| C6   | C5   | C10  | 120.4(3)   | C25  | C26  | Fe1  | 69.88(19) |
| C1   | C6   | C5   | 119.1(3)   | C25  | C26  | C27  | 108.4(3)  |
| C1   | C6   | C7   | 119.3(3)   | C27  | C26  | Fe1  | 69.4(2)   |
| C5   | C6   | C7   | 121.7(3)   | C26  | C27  | Fe1  | 70.2(2)   |
| O2   | C7   | C6   | 118.8(3)   | C26  | C27  | C28  | 107.2(4)  |
| O2   | C7   | C8   | 122.9(3)   | C28  | C27  | Fe1  | 69.1(2)   |
| C8   | C7   | C6   | 118.3(2)   | C27  | C28  | Fe1  | 69.8(2)   |
| C9   | C8   | C7   | 120.0(3)   | C29  | C28  | Fe1  | 70.0(2)   |
| C11  | C8   | C7   | 122.8(2)   | C29  | C28  | C27  | 107.9(4)  |
| C11  | C8   | C9   | 117.2(3)   | C25  | C29  | Fe1  | 70.28(18) |
| C8   | C9   | C10  | 121.0(3)   | C25  | C29  | C28  | 108.0(4)  |
| C14  | C9   | C8   | 121.2(3)   | C28  | C29  | Fe1  | 69.4(2)   |

**Table S8.** Hydrogen-Atom Coordinates ( $\text{\AA}\times 10^4$ ) and Isotropic Displacement Parameters ( $\text{\AA}^2\times 10^3$ ) for **1-FcAQ**.

| Atom | x        | y       | z        | U(eq) |
|------|----------|---------|----------|-------|
| H1   | 4593.22  | 2754.61 | 1905.25  | 57    |
| H2   | 5201.99  | 873.67  | 1565.02  | 69    |
| H3   | 7226.46  | 524.83  | 2850.71  | 72    |
| H4   | 8602.16  | 2052.9  | 4504.9   | 67    |
| H12  | 7072.26  | 8590.07 | 6081.19  | 52    |
| H13  | 9046.14  | 8158.99 | 7324.07  | 65    |
| H14  | 9563.27  | 6239.75 | 6951.04  | 60    |
| H15A | 5933.53  | 9009.69 | 4368.89  | 46    |
| H15B | 4706.89  | 8502.43 | 5040.09  | 46    |
| H36A | 1000.83  | 7130.86 | -1117.42 | 78    |
| H36B | 2098.48  | 6692.63 | -143     | 78    |
| H36C | 2591.9   | 8150.13 | -355.81  | 78    |
| H30  | 693.76   | 8596.96 | 306.43   | 39    |
| H35  | 3159.65  | 6868.03 | 1856.68  | 33    |
| H31A | 2351.96  | 8345.19 | -191.29  | 80    |
| H31B | 806.37   | 8606.35 | -137.75  | 80    |
| H31C | 767.81   | 7445.19 | -1067.66 | 80    |
| H18  | 1467.88  | 6313.18 | 298.47   | 42    |
| H17  | 3168.74  | 6411.83 | 2320.52  | 38    |
| H20  | -3176.95 | 4726.02 | 1412.08  | 57    |
| H21  | -297.02  | 5948.19 | 2169.29  | 55    |
| H23  | -1831.61 | 6442.96 | -1187.94 | 49    |
| H24  | -4139.45 | 5028.49 | -656.89  | 49    |
| H25  | -2702.82 | 9062.5  | -195.7   | 78    |
| H26  | -4881.75 | 7607.56 | 405.74   | 76    |
| H27  | -3787.6  | 7280.19 | 2451.65  | 89    |
| H28  | -892.9   | 8559.51 | 3105.52  | 91    |
| H29  | -244.28  | 9651.4  | 1459.69  | 84    |

**Table S9.** Crystal data and details of data collection and refinement for **4-FcC**.

|                                             |                                                                 |
|---------------------------------------------|-----------------------------------------------------------------|
| Identification code                         | AH_Coum_Fc_0m_a                                                 |
| Empirical formula                           | C <sub>24</sub> H <sub>21</sub> FeN <sub>3</sub> O <sub>3</sub> |
| Formula weight                              | 455.29                                                          |
| Temperature/K                               | 150(2)                                                          |
| Crystal system                              | monoclinic                                                      |
| Space group                                 | P2 <sub>1</sub> /n                                              |
| a/Å                                         | 5.7127(6)                                                       |
| b/Å                                         | 29.914(3)                                                       |
| c/Å                                         | 12.0899(14)                                                     |
| α/°                                         | 90                                                              |
| β/°                                         | 91.627(2)                                                       |
| γ/°                                         | 90                                                              |
| Volume/Å <sup>3</sup>                       | 2065.2(4)                                                       |
| Z                                           | 4                                                               |
| ρ <sub>calc</sub> /cm <sup>3</sup>          | 1.464                                                           |
| μ/mm <sup>-1</sup>                          | 0.762                                                           |
| F(000)                                      | 944.0                                                           |
| Crystal size/mm                             | 0.476 × 0.374 × 0.172                                           |
| Radiation                                   | MoKα (λ = 0.71073)                                              |
| 2θ range for data collection/°              | 3.634 to 52.922                                                 |
| Index ranges                                | -7 ≤ h ≤ 7, -37 ≤ k ≤ 37, -15 ≤ l ≤ 15                          |
| Reflections collected                       | 16206                                                           |
| Independent reflections                     | 4232 [R <sub>int</sub> = 0.0390, R <sub>sigma</sub> = 0.0428]   |
| Data/restraints/parameters                  | 4232/18/316                                                     |
| Goodness-of-fit on F <sup>2</sup>           | 1.085                                                           |
| Final R indexes [I >= 2σ (I)]               | R <sub>1</sub> = 0.0478, wR <sub>2</sub> = 0.1033               |
| Final R indexes [all data]                  | R <sub>1</sub> = 0.0727, wR <sub>2</sub> = 0.1078               |
| Largest diff. peak/hole / e Å <sup>-3</sup> | 0.58/-0.40                                                      |

**Table S10** Fractional Atomic Coordinates ( $\times 10^4$ ) and Equivalent Isotropic Displacement Parameters ( $\text{\AA}^2 \times 10^3$ ) for **4-FeC**.  $U_{\text{eq}}$  is defined as 1/3 of the trace of the orthogonalised  $U_{\text{H}}$  tensor.

| Atom | <i>x</i>  | <i>y</i>   | <i>z</i>   | $U_{\text{eq}}$ |
|------|-----------|------------|------------|-----------------|
| Fe1  | 4877.2(6) | 2099.2(2)  | 4838.1(3)  | 33.25(14)       |
| O1   | 6655(4)   | 4682.1(6)  | 7088.5(17) | 48.2(5)         |
| O2   | 7588(5)   | 5527.4(8)  | 10386(2)   | 69.3(7)         |
| O3   | 4794(4)   | 5701.5(7)  | 9171.4(19) | 60.0(6)         |
| N3   | 10439(4)  | 3858.7(9)  | 6182(2)    | 48.2(7)         |
| C1   | 6673(6)   | 5436.9(10) | 9503(3)    | 50.8(8)         |
| C2   | 7326(6)   | 5082.2(9)  | 8782(3)    | 43.5(7)         |
| C3   | 6175(5)   | 5006.5(9)  | 7814(3)    | 41.2(7)         |
| C4   | 4219(5)   | 5287.2(9)  | 7468(3)    | 44.6(7)         |
| C5   | 3600(6)   | 5628.8(10) | 8186(3)    | 50.5(8)         |
| C6   | 1725(7)   | 5906.4(12) | 7938(3)    | 64.7(10)        |
| C7   | 480(7)    | 5846.4(13) | 6971(4)    | 68.3(11)        |
| C8   | 1061(7)   | 5509.7(13) | 6235(3)    | 68.0(11)        |
| C9   | 2918(6)   | 5230.7(11) | 6487(3)    | 56.6(9)         |
| C10  | 8346(6)   | 4351.9(10) | 7450(3)    | 49.1(8)         |
| C31  | 5550(60)  | 3124(7)    | 5010(20)   | 21(7)           |
| N4   | 6900(60)  | 3478(11)   | 5710(30)   | 31(7)           |
| N5   | 9210(80)  | 3465(10)   | 5510(30)   | 27(7)           |
| C11  | 8393(5)   | 3992.9(9)  | 6608(2)    | 39.1(7)         |
| C12  | 6635(5)   | 3740.4(11) | 6155(3)    | 45.1(8)         |
| C13  | 4924(7)   | 3288.2(13) | 3968(3)    | 68.3(11)        |
| N1   | 7769(10)  | 3458.5(10) | 5445(3)    | 34.1(9)         |
| N2   | 10090(8)  | 3537.4(14) | 5485(3)    | 43.1(11)        |
| C14  | 6834(8)   | 3105.9(11) | 4695(3)    | 39.4(12)        |
| C16  | 6174(5)   | 2701.0(9)  | 5383(2)    | 33.7(6)         |
| C15  | 4060(6)   | 2610.5(11) | 5903(3)    | 45.7(8)         |
| C17  | 7765(5)   | 2347.2(10) | 5638(3)    | 43.4(8)         |
| C18  | 6547(6)   | 2036.5(10) | 6330(3)    | 54.6(9)         |
| C19  | 4295(7)   | 2208.8(12) | 6467(3)    | 52.0(9)         |
| C20  | 4572(6)   | 2095.2(12) | 3138(3)    | 54.7(9)         |
| C21  | 5957(6)   | 1739.9(15) | 3510(3)    | 65.3(12)        |

**Table S11.** Anisotropic Displacement Parameters ( $\text{\AA}^2 \times 10^3$ ) for **4-FeC**. The Anisotropic displacement factor exponent takes the form:  $-2\pi^2[h^2a^{*2}U_{11}+2hka^*b^*U_{12}+\dots]$ .

| Atom | U <sub>11</sub> | U <sub>22</sub> | U <sub>33</sub> | U <sub>23</sub> | U <sub>13</sub> | U <sub>12</sub> |
|------|-----------------|-----------------|-----------------|-----------------|-----------------|-----------------|
| Fe1  | 30.4(2)         | 38.1(2)         | 30.9(2)         | -9.36(18)       | -4.77(16)       | -1.15(18)       |
| O1   | 63.4(13)        | 35.0(11)        | 44.9(12)        | -3.3(10)        | -17.5(11)       | 9.9(10)         |
| O2   | 81.7(17)        | 64.3(16)        | 61.0(16)        | -19.4(13)       | -15.5(14)       | -11.4(13)       |
| O3   | 75.6(16)        | 43.9(13)        | 60.2(15)        | -8.8(11)        | -4.3(13)        | 4.3(12)         |
| N3   | 45.5(15)        | 44.7(15)        | 53.9(17)        | 1.1(13)         | -6.5(13)        | -0.5(12)        |
| C1   | 58(2)           | 39.6(18)        | 54(2)           | -1.3(15)        | -3.4(17)        | -12.8(16)       |
| C2   | 49.4(18)        | 32.1(16)        | 48.7(19)        | -0.2(13)        | -5.9(15)        | -4.7(13)        |
| C3   | 50.3(17)        | 27.3(14)        | 45.6(19)        | 4.8(13)         | -6.4(15)        | -4.8(13)        |
| C4   | 51.6(18)        | 32.4(16)        | 49.7(19)        | 8.3(14)         | -1.9(15)        | 0.0(14)         |
| C5   | 56(2)           | 37.5(17)        | 58(2)           | 8.8(15)         | 4.9(17)         | 0.0(15)         |
| C6   | 74(2)           | 47(2)           | 74(3)           | 11.4(19)        | 12(2)           | 14.2(19)        |
| C7   | 62(2)           | 59(2)           | 84(3)           | 26(2)           | 6(2)            | 17.8(19)        |
| C8   | 66(2)           | 72(3)           | 65(2)           | 24(2)           | -12(2)          | 4(2)            |
| C9   | 65(2)           | 50(2)           | 54(2)           | 7.4(16)         | -9.4(18)        | 6.6(17)         |
| C10  | 60(2)           | 35.9(16)        | 49.7(19)        | -2.3(14)        | -18.0(16)       | 8.3(15)         |
| C31  | 20(7)           | 21(7)           | 20(7)           | -0.1(10)        | 0.6(10)         | -0.1(10)        |
| N4   | 30(8)           | 31(8)           | 31(8)           | -0.1(10)        | 0.9(11)         | -0.1(10)        |
| N5   | 27(7)           | 27(7)           | 27(7)           | -0.2(10)        | 0.7(11)         | 0.0(10)         |
| C11  | 43.7(17)        | 32.1(15)        | 40.8(17)        | 2.6(12)         | -9.6(14)        | 2.4(13)         |
| C12  | 41.4(17)        | 43.6(18)        | 49.8(19)        | -1.5(16)        | -5.7(15)        | 1.2(14)         |
| C13  | 78(3)           | 75(3)           | 51(2)           | 11.1(19)        | -14.7(19)       | -16(2)          |
| N1   | 30(2)           | 32.0(16)        | 40(2)           | -3.3(13)        | 3.9(19)         | 1.5(15)         |
| N2   | 30(2)           | 45(2)           | 55(2)           | -0.6(15)        | 0.6(17)         | -0.3(17)        |
| C14  | 37(3)           | 44(2)           | 37(2)           | -5.6(15)        | 3.1(18)         | -3.2(16)        |
| C16  | 31.1(14)        | 38.1(15)        | 31.4(15)        | -10.3(12)       | -4.9(12)        | -0.7(12)        |
| C15  | 45.8(18)        | 46.7(19)        | 44.7(18)        | -16.1(15)       | 3.8(15)         | -2.3(15)        |
| C17  | 31.9(15)        | 46.3(18)        | 51.0(18)        | -19.2(15)       | -15.4(14)       | 3.2(13)         |
| C18  | 79(2)           | 35.0(17)        | 48.3(19)        | -3.1(14)        | -34.9(18)       | -1.4(16)        |
| C19  | 58(2)           | 64(2)           | 33.9(18)        | -9.2(16)        | 4.6(16)         | -15.4(18)       |
| C20  | 64(2)           | 70(2)           | 30.3(16)        | -11.9(16)       | 2.3(16)         | -15.8(19)       |
| C21  | 37.4(17)        | 102(3)          | 56(2)           | -51(2)          | -2.1(17)        | 2(2)            |
| C22  | 82(3)           | 38.3(18)        | 62(2)           | -25.6(17)       | -38(2)          | 16.2(18)        |
| C23  | 46.1(18)        | 48.7(18)        | 43.4(18)        | -7.2(15)        | -8.6(15)        | -15.0(15)       |
| C24  | 44.1(17)        | 51.1(19)        | 40.8(17)        | -8.0(15)        | -13.9(14)       | 4.4(14)         |

**Table S12.** Bond Lengths for **4-FcC**.

| Atom | Atom | Length/Å | Atom | Atom | Length/Å |
|------|------|----------|------|------|----------|
| Fe1  | C16  | 2.049(3) | C7   | C8   | 1.390(5) |
| Fe1  | C15  | 2.062(3) | C8   | C9   | 1.377(5) |
| Fe1  | C17  | 2.029(3) | C10  | C11  | 1.481(4) |
| Fe1  | C18  | 2.025(3) | C31  | N4   | 1.55(4)  |
| Fe1  | C19  | 2.033(3) | C31  | C13  | 1.38(2)  |
| Fe1  | C20  | 2.058(3) | C31  | C16  | 1.39(2)  |
| Fe1  | C21  | 2.042(3) | N4   | N5   | 1.35(4)  |
| Fe1  | C22  | 2.031(3) | N4   | C12  | 0.97(3)  |
| Fe1  | C23  | 2.041(3) | N5   | C12  | 1.87(4)  |
| Fe1  | C24  | 2.047(3) | C11  | C12  | 1.359(4) |
| O1   | C3   | 1.342(3) | C12  | N1   | 1.378(6) |
| O1   | C10  | 1.441(3) | C13  | C14  | 1.486(5) |
| O2   | C1   | 1.206(4) | N1   | N2   | 1.346(5) |
| O3   | C1   | 1.384(4) | N1   | C14  | 1.481(4) |
| O3   | C5   | 1.373(4) | C14  | C16  | 1.523(5) |
| N3   | N5   | 1.58(3)  | C16  | C15  | 1.404(4) |
| N3   | C11  | 1.352(4) | C16  | C17  | 1.423(4) |
| N3   | N2   | 1.290(5) | C15  | C19  | 1.386(5) |
| C1   | C2   | 1.430(4) | C17  | C18  | 1.443(5) |
| C2   | C3   | 1.345(4) | C18  | C19  | 1.400(5) |
| C3   | C4   | 1.450(4) | C20  | C21  | 1.392(5) |
| C4   | C5   | 1.393(4) | C20  | C24  | 1.394(5) |
| C4   | C9   | 1.392(4) | C21  | C22  | 1.411(5) |
| C5   | C6   | 1.382(5) | C22  | C23  | 1.409(5) |
| C6   | C7   | 1.363(5) | C23  | C24  | 1.402(4) |
| Fe1  | C16  | 2.049(3) | C7   | C8   | 1.390(5) |
| Fe1  | C15  | 2.062(3) | C8   | C9   | 1.377(5) |

**Table S13.** Bond Angles for **4-FcC**.

| Atom | Atom | Atom | Angle/°    |
|------|------|------|------------|
| C16  | Fe1  | C15  | 39.93(11)  |
| C16  | Fe1  | C20  | 110.25(13) |
| C17  | Fe1  | C16  | 40.84(11)  |
| C17  | Fe1  | C15  | 68.07(12)  |
| C17  | Fe1  | C19  | 68.45(14)  |
| C17  | Fe1  | C20  | 121.52(14) |
| C17  | Fe1  | C21  | 107.92(13) |
| C17  | Fe1  | C22  | 124.70(13) |
| C17  | Fe1  | C23  | 161.64(13) |
| C17  | Fe1  | C24  | 156.42(13) |
| C18  | Fe1  | C16  | 68.76(11)  |
| C18  | Fe1  | C15  | 67.77(13)  |
| C18  | Fe1  | C17  | 41.70(13)  |
| C18  | Fe1  | C19  | 40.36(14)  |
| C18  | Fe1  | C20  | 156.01(16) |
| C18  | Fe1  | C21  | 120.45(15) |
| C18  | Fe1  | C22  | 106.12(13) |
| C18  | Fe1  | C23  | 123.67(13) |
| C18  | Fe1  | C24  | 161.29(14) |
| C19  | Fe1  | C16  | 67.31(13)  |
| C19  | Fe1  | C15  | 39.57(14)  |
| C19  | Fe1  | C20  | 163.10(15) |
| C19  | Fe1  | C21  | 155.23(17) |
| C19  | Fe1  | C23  | 107.50(14) |
| C19  | Fe1  | C24  | 126.21(14) |
| C20  | Fe1  | C15  | 127.87(15) |
| C21  | Fe1  | C16  | 126.94(15) |
| C21  | Fe1  | C15  | 163.82(17) |
| C21  | Fe1  | C20  | 39.68(15)  |
| C21  | Fe1  | C24  | 66.85(13)  |
| C22  | Fe1  | C16  | 163.01(14) |
| C22  | Fe1  | C15  | 154.73(16) |
| C22  | Fe1  | C19  | 119.99(16) |
| C22  | Fe1  | C20  | 67.44(15)  |
| C22  | Fe1  | C21  | 40.52(15)  |
| C22  | Fe1  | C23  | 40.49(13)  |
| C22  | Fe1  | C24  | 67.37(12)  |
| C23  | Fe1  | C16  | 155.79(12) |
| C23  | Fe1  | C15  | 121.00(13) |
| C23  | Fe1  | C20  | 67.42(13)  |
| C23  | Fe1  | C21  | 67.80(14)  |

| Atom | Atom | Atom | Angle/°   |
|------|------|------|-----------|
| C6   | C7   | C8   | 121.1(3)  |
| C9   | C8   | C7   | 119.6(4)  |
| C8   | C9   | C4   | 120.3(4)  |
| O1   | C10  | C11  | 108.3(2)  |
| C13  | C31  | N4   | 111.4(18) |
| C13  | C31  | C16  | 132.8(18) |
| C16  | C31  | N4   | 108.8(17) |
| N5   | N4   | C31  | 111(3)    |
| C12  | N4   | C31  | 141(3)    |
| C12  | N4   | N5   | 107(3)    |
| N3   | N5   | C12  | 78.7(14)  |
| N4   | N5   | N3   | 108(3)    |
| N4   | N5   | C12  | 29.6(15)  |
| N3   | C11  | C10  | 120.7(3)  |
| N3   | C11  | C12  | 108.6(3)  |
| C12  | C11  | C10  | 130.7(3)  |
| N4   | C12  | N5   | 43.5(18)  |
| N4   | C12  | C11  | 123(2)    |
| C11  | C12  | N5   | 80.3(11)  |
| C11  | C12  | N1   | 103.6(3)  |
| C12  | N1   | C14  | 130.5(4)  |
| N2   | N1   | C12  | 110.5(3)  |
| N2   | N1   | C14  | 119.0(4)  |
| N3   | N2   | N1   | 106.7(3)  |
| C13  | C14  | C16  | 115.2(3)  |
| N1   | C14  | C13  | 110.3(3)  |
| N1   | C14  | C16  | 108.8(3)  |
| C31  | C16  | Fe1  | 127.4(9)  |
| C31  | C16  | C15  | 96.1(14)  |
| C31  | C16  | C17  | 154.9(14) |
| C14  | C16  | Fe1  | 128.0(2)  |
| C15  | C16  | Fe1  | 70.53(16) |
| C15  | C16  | C14  | 128.8(3)  |
| C15  | C16  | C17  | 108.2(3)  |
| C17  | C16  | Fe1  | 68.83(15) |
| C17  | C16  | C14  | 122.9(3)  |
| C16  | C15  | Fe1  | 69.54(16) |
| C19  | C15  | Fe1  | 69.10(19) |
| C19  | C15  | C16  | 108.3(3)  |
| C16  | C17  | Fe1  | 70.33(15) |
| C16  | C17  | C18  | 106.8(3)  |



**Table S13.** Bond Angles for **4-FcC**.

| Atom | Atom | Atom | Angle/°    |
|------|------|------|------------|
| C23  | Fe1  | C24  | 40.10(12)  |
| C24  | Fe1  | C16  | 122.47(12) |
| C24  | Fe1  | C15  | 110.14(13) |
| C24  | Fe1  | C20  | 39.69(13)  |
| C3   | O1   | C10  | 116.4(2)   |
| C5   | O3   | C1   | 121.5(3)   |
| C11  | N3   | N5   | 92.3(15)   |
| N2   | N3   | C11  | 110.5(3)   |
| O2   | C1   | O3   | 116.2(3)   |
| O2   | C1   | C2   | 126.3(3)   |
| O3   | C1   | C2   | 117.5(3)   |
| C3   | C2   | C1   | 121.7(3)   |
| O1   | C3   | C2   | 125.9(3)   |
| O1   | C3   | C4   | 113.6(3)   |
| C2   | C3   | C4   | 120.5(3)   |
| C5   | C4   | C3   | 116.9(3)   |
| C9   | C4   | C3   | 124.3(3)   |
| C9   | C4   | C5   | 118.8(3)   |
| O3   | C5   | C4   | 121.9(3)   |
| O3   | C5   | C6   | 117.1(3)   |
| C6   | C5   | C4   | 121.0(3)   |
| C7   | C6   | C5   | 119.3(4)   |

| Atom | Atom | Atom | Angle/°   |
|------|------|------|-----------|
| C18  | C17  | Fe1  | 69.02(16) |
| C17  | C18  | Fe1  | 69.28(16) |
| C19  | C18  | Fe1  | 70.11(18) |
| C19  | C18  | C17  | 106.9(3)  |
| C15  | C19  | Fe1  | 71.33(19) |
| C15  | C19  | C18  | 109.7(3)  |
| C18  | C19  | Fe1  | 69.53(19) |
| C21  | C20  | Fe1  | 69.55(19) |
| C21  | C20  | C24  | 107.9(3)  |
| C24  | C20  | Fe1  | 69.74(17) |
| C20  | C21  | Fe1  | 70.77(19) |
| C20  | C21  | C22  | 108.2(3)  |
| C22  | C21  | Fe1  | 69.32(18) |
| C21  | C22  | Fe1  | 70.16(19) |
| C23  | C22  | Fe1  | 70.14(17) |
| C23  | C22  | C21  | 107.7(3)  |
| C22  | C23  | Fe1  | 69.37(17) |
| C24  | C23  | Fe1  | 70.18(16) |
| C24  | C23  | C22  | 107.2(3)  |
| C20  | C24  | Fe1  | 70.57(17) |
| C20  | C24  | C23  | 108.9(3)  |
| C23  | C24  | Fe1  | 69.72(16) |

**Table S14.** Hydrogen-Atom Coordinates ( $\text{\AA}\times 10^4$ ) and Isotropic Displacement Parameters ( $\text{\AA}^2\times 10^3$ ) for **4-FcC**.

| Atom | <i>x</i> | <i>y</i> | <i>z</i> | U(eq)  |
|------|----------|----------|----------|--------|
| H2   | 8606.75  | 4895.1   | 8991.67  | 52     |
| H6   | 1307.31  | 6136.75  | 8435.91  | 78     |
| H7   | -805.69  | 6037.68  | 6796.37  | 82     |
| H8   | 183.2    | 5472.34  | 5562.45  | 82     |
| H9   | 3312.64  | 4998.6   | 5989.83  | 68     |
| H10A | 7906.92  | 4226.66  | 8172.69  | 59     |
| H10B | 9914.29  | 4490.39  | 7536.76  | 59     |
| H102 | 3210(60) | 2061(11) | 6880(30) | 59(10) |
| H101 | 2670(70) | 2823(12) | 5840(30) | 73(11) |
| H31  | 3990.99  | 3148.42  | 5357.86  | 25     |
| H12  | 5008.49  | 3754.94  | 6294.43  | 54     |
| H13A | 4320.97  | 3051.7   | 3476.71  | 103    |
| H13B | 3657.12  | 3399.39  | 4423.72  | 103    |
| H13C | 5533.46  | 3533.86  | 3523.68  | 103    |
| H13D | 4686.73  | 3604.93  | 4139.37  | 103    |
| H13E | 5350.58  | 3257.25  | 3192.35  | 103    |
| H13F | 3474.24  | 3122.77  | 4092.39  | 103    |
| H14  | 8132.18  | 3012.5   | 4208.37  | 47     |
| H17  | 9419.49  | 2322.09  | 5396.73  | 52     |
| H18  | 7197.46  | 1754.91  | 6661.9   | 66     |
| H20  | 5068.3   | 2340.09  | 2632.76  | 66     |
| H21  | 7619.4   | 1683.74  | 3312.19  | 78     |
| H22  | 5133.42  | 1189.6   | 4584.01  | 74     |
| H23  | 1014.59  | 1548.84  | 4681.66  | 55     |
| H24  | 1025.55  | 2259.59  | 3477.63  | 55     |

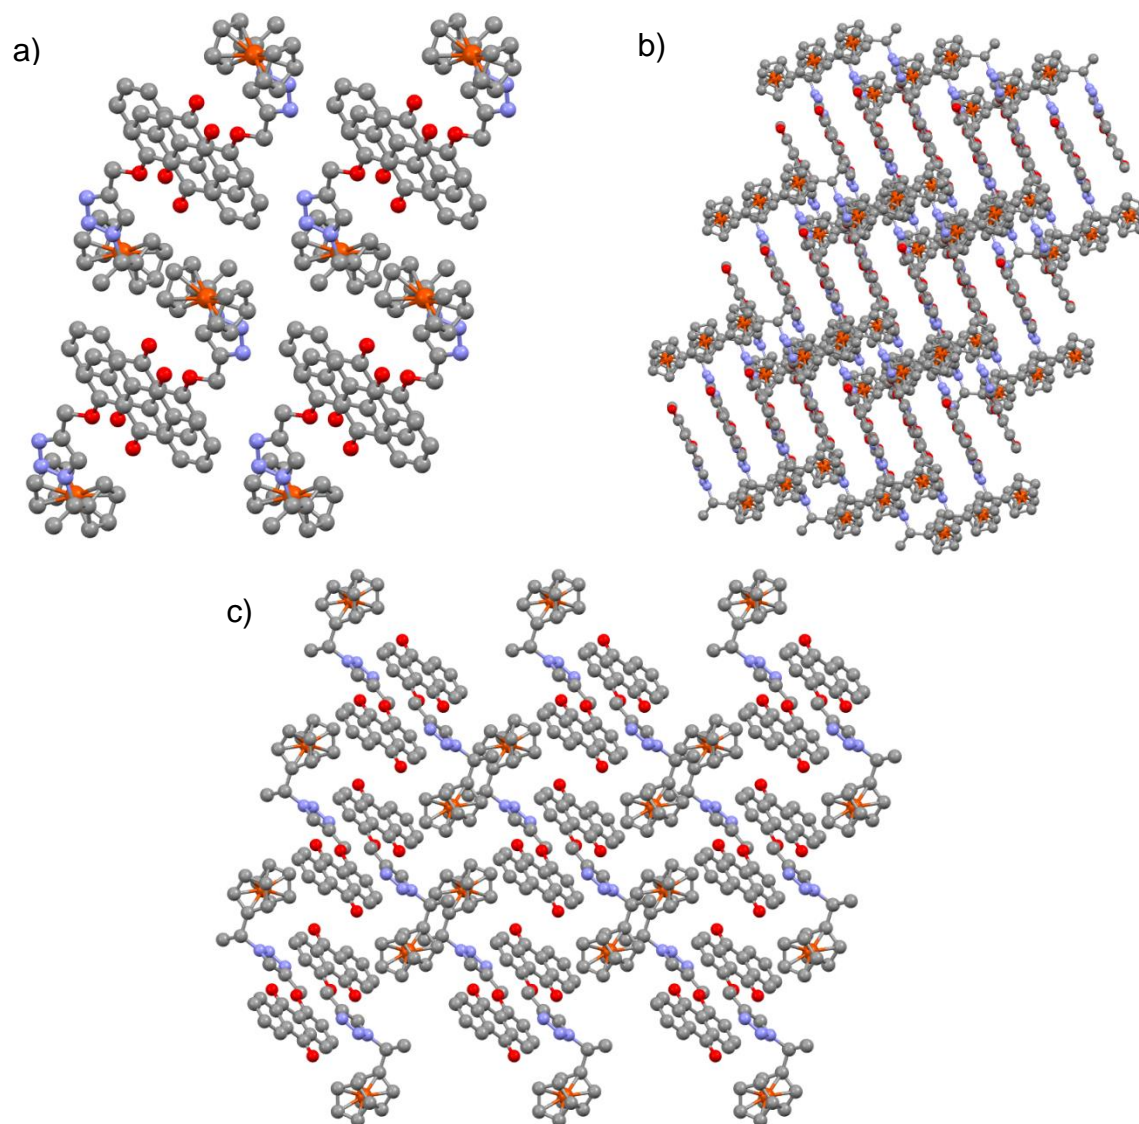

**Figure S15.** Extended crystal lattice from X-ray crystal structure of **1-FcAQ** viewed along: a) the crystallographic *a* axis, b) the anthraquinone molecular plane, and c) crystallographic *b* axis.

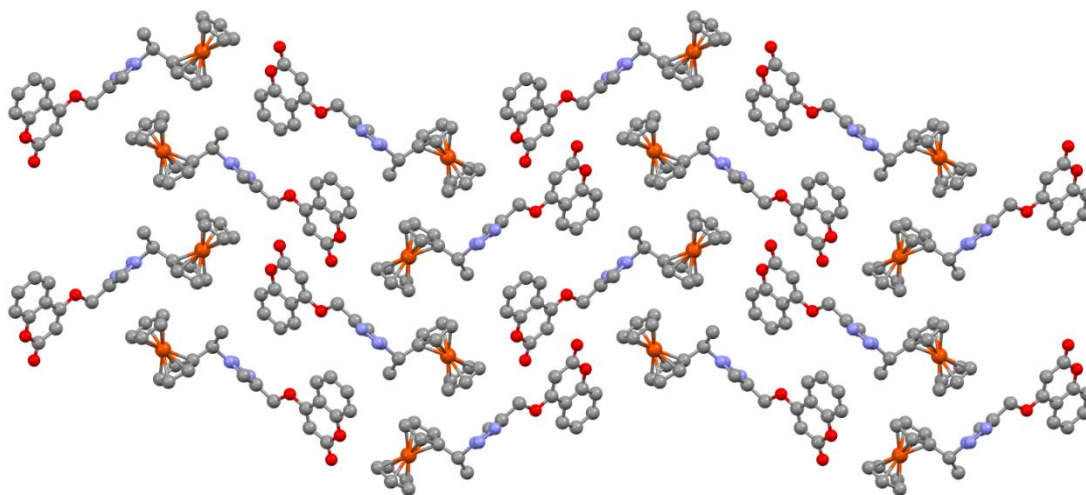

**Figure S16.** Extended crystal lattice from X-ray crystal structure of **4-FcC** viewed along the crystallographic *a*-axis.

## Calculations of logP

Due to limited aqueous solubility and modest extinction coefficients, experimental evaluation of logP for **1,2-DiFcAQ**, **1-FcAQ**, and **4-FcC** using the octanol/water “shake flask” method and UV-Vis measurements was not successful. Furthermore, software to directly calculate logP values of metal-containing compounds is not widely available. However, an approximate calculated value (clogP) can be obtained using the approach of Rekker.<sup>6</sup> This method deconvolutes molecules of interest into smaller substructures and the sum of contributions from each component is used to estimate the logP of the whole compound. Initially, a theoretical logP was calculated for substructures of the Fc compounds where Fc was replaced by a methyl group. This was done using ChemDraw, which utilizes a combination of Crippen’s<sup>7</sup> and Viswanadhan’s<sup>8</sup> fragmentation. The logP value for ferrocene has been reported previously to be 2.66,<sup>9</sup> and the contribution from the methyl group were determined from tables published by Rekker.<sup>6</sup> Using these values, the final value of clogP resulting from changing the methyl group of the organic fragments to Fc was calculated as described by Ahmedi *et al.*,<sup>9</sup> and outlined in the calculations below.

### 1,2-DiFcAQ:

$$cLogP = (cLogP \text{ Organic Fragment}) - (f_{CH_3}) + (f_{Fc}) - (f_{Fc-H})$$

$$cLogP = (3.0307) - (2 \times 0.724) + (2 \times 2.660) - (2 \times 0.204)$$

$$cLogP = 6.49$$

### 1-FcAQ:

$$cLogP = (cLogP \text{ Organic Fragment}) - (f_{CH_3}) + (f_{Fc}) - (f_{Fc-H})$$

$$cLogP = (3.4719) - (0.724) + (2.660) - (0.204)$$

$$cLogP = 5.20$$

### 4-FcC:

$$cLogP = (cLogP \text{ Organic Fragment}) - (f_{CH_3}) + (f_{Fc}) - (f_{Fc-H})$$

$$cLogP = (1.8175) - (0.724) + (2.660) - (0.204)$$

$$cLogP = 3.55$$

## UV-Vis Characterization

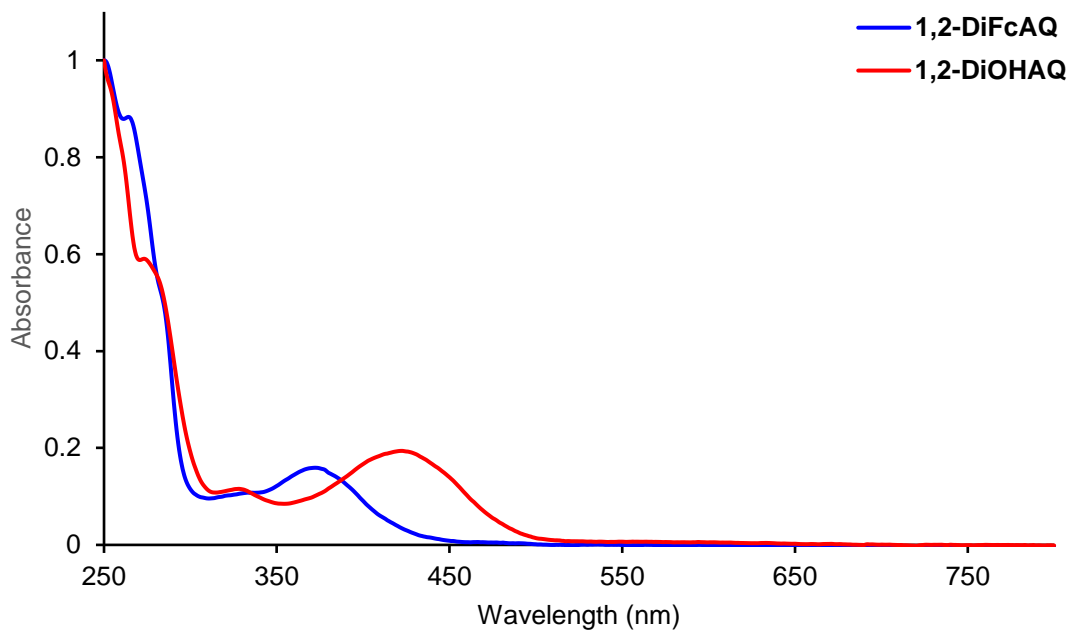

**Figure S17.** UV-Vis spectrum of **1,2-DiFcAQ** and **1,2-DiOHAQ** in acetonitrile. Concentration = 25  $\mu\text{M}$ .

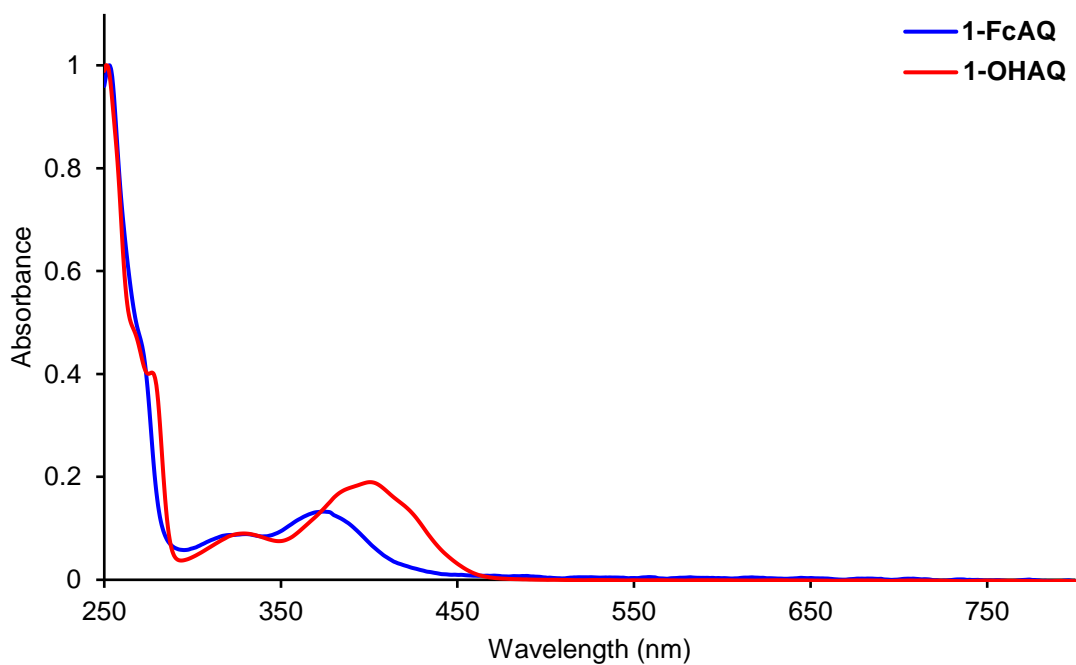

**Figure S18.** UV-Vis spectrum of **1-FcAQ** and **1-OHAQ** in acetonitrile. Concentration = 25  $\mu\text{M}$ .

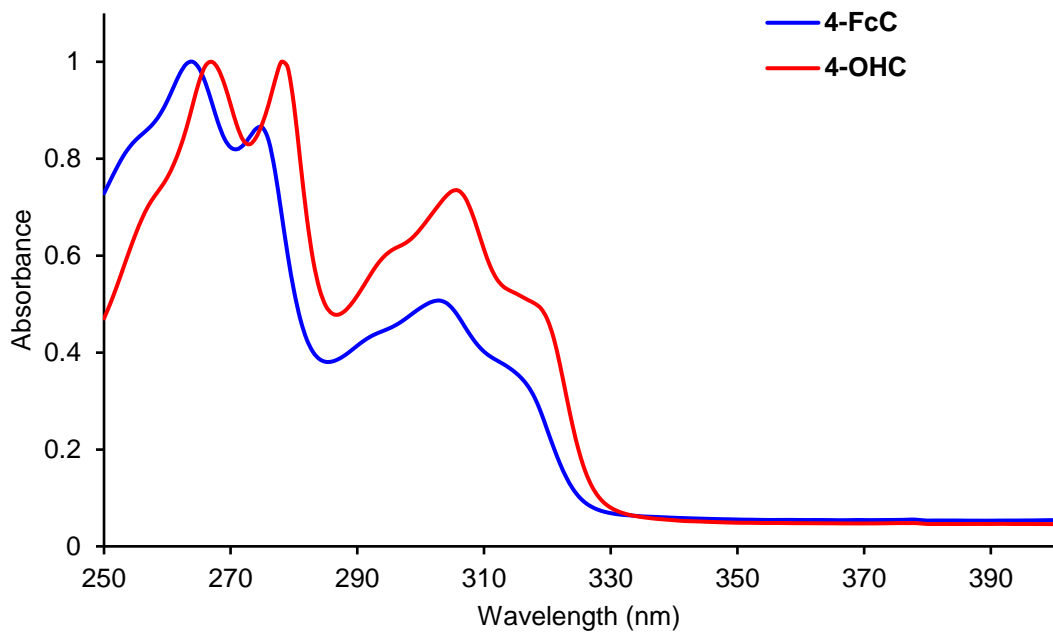

**Figure S19.** UV-Vis spectrum of **4-FcC** and **4-OHC** in acetonitrile. Concentration = 100  $\mu$ M.

## References

- 1 R. G. Balasingham, C. F. Williams, H. J. Mottram, M. P. Coogan and S. J. A. Pope, *Organometallics*, 2012, **31**, 5835-5843.
- 2 S. Nadali, G. Aghapour and Z. Rafieepour, *Can. J. Chem.*, 2017, **95**, 1045-1051.
- 3 P. Thasnim and D. Bahulayan, *New J. Chem.*, 2017, **41**, 13483-13489.
- 4 B. M. Upton, R. M. Gipson, S. Duhovic, B. R. Lydon, N. M. Matsumoto, H. D. Maynard and P. L. Diaconescu, *Inorg. Chem. Front.*, 2014, **1**, 271-277.
- 5 S. Stoll and A. Schweiger, *J. Magn. Reson.*, 2006, **178**, 42-55.
- 6 R. Mannhold and R. F. Rekker, *Perspect. Drug Discov. Des.*, 2000, **18**, 1-18.
- 7 A. K. Ghose and G. M. Crippen, *J. Chem. Inf. Comput. Sci.*, 1987, **27**, 21-35.
- 8 V. N. Viswanadhan, A. K. Ghose, G. R. Revankar and R. K. Robins, *J. Chem. Inf. Comput. Sci.*, 1989, **29**, 163-172.
- 9 R. Ahmedi and T. Lanez, *Asian J. Chem.*, 2010, **22**, 299-306.
